# Supplementary material for: Differentiation between Germinoma and Craniopharyngioma Using Radiomics-Based Machine Learning
Source: MDPI journal article supplement (doi:10.3390/jpm12010045), 2022-01-04
Supplement: s1 [file s1]

**Contrast-enhanced T1WI. Feature selector: DC**

| Cicle | Feature           |                   |                   |                   |                   |                    |
|-------|-------------------|-------------------|-------------------|-------------------|-------------------|--------------------|
| 1     | HISTO_Energy      | GLCM_Homogeneity  | GLRLM_RP          | HISTO_Entropy_log | GLRLM_SRE         | GLCM_Energy        |
| 2     | HISTO_Energy      | GLCM_Energy       | GLRLM_RP          | HISTO_Entropy_log | GLCM_Homogeneity  | GLRLM_SRE          |
| 3     | HISTO_Energy      | HISTO_Entropy_log | GLCM_Homogeneity  | GLRLM_RP          | GLCM_Energy       | GLRLM_SRE          |
| 4     | GLRLM_RP          | GLCM_Homogeneity  | HISTO_Energy      | GLCM_Energy       | HISTO_Entropy_log | GLRLM_SRE          |
| 5     | HISTO_Energy      | HISTO_Entropy_log | GLZLM_ZLNU        | SHAPE_Volume (ml) | GLRLM_RP          | GLCM_Homogeneity   |
| 6     | HISTO_Energy      | HISTO_Entropy_log | GLCM_Homogeneity  | GLCM_Energy       | GLZLM_ZLNU        | SHAPE_Volume (ml)  |
| 7     | SHAPE_Volume (ml) | GLZLM_ZLNU        | HISTO_Energy      | GLCM_Homogeneity  | GLRLM_RP          | GLCM_Energy        |
| 8     | GLCM_Homogeneity  | HISTO_Energy      | HISTO_Entropy_log | GLRLM_RP          | GLZLM_ZLNU        | GLCM_Energy        |
| 9     | HISTO_Energy      | HISTO_Entropy_log | GLCM_Homogeneity  | GLRLM_RP          | GLCM_Energy       | GLRLM_SRE          |
| 10    | GLZLM_ZLNU        | HISTO_Energy      | HISTO_Entropy_log | GLCM_Energy       | GLCM_Homogeneity  | GLRLM_RP           |
| 11    | HISTO_Energy      | GLCM_Homogeneity  | GLRLM_RP          | GLCM_Energy       | HISTO_Entropy_log | GLRLM_SRE          |
| 12    | HISTO_Energy      | GLRLM_RP          | GLZLM_ZLNU        | GLCM_Energy       | GLCM_Homogeneity  | HISTO_Entropy_log  |
| 13    | GLCM_Homogeneity  | HISTO_Energy      | HISTO_Entropy_log | GLRLM_RP          | GLZLM_ZLNU        | GLCM_Energy        |
| 14    | HISTO_Energy      | HISTO_Entropy_log | GLRLM_RP          | GLCM_Homogeneity  | GLCM_Energy       | GLZLM_ZLNU         |
| 15    | HISTO_Energy      | GLRLM_RP          | GLCM_Homogeneity  | GLCM_Energy       | SHAPE_Volume (ml) | HISTO_Entropy_log  |
| 16    | HISTO_Energy      | HISTO_Entropy_log | GLCM_Energy       | GLCM_Homogeneity  | GLRLM_LRHGE       | GLZLM_HGZE         |
| 17    | HISTO_Energy      | GLZLM_ZLNU        | GLCM_Energy       | HISTO_Entropy_log | GLCM_Homogeneity  | GLRLM_RP           |
| 18    | HISTO_Energy      | HISTO_Entropy_log | GLCM_Homogeneity  | GLRLM_RP          | GLCM_Energy       | GLRLM_SRHGE        |
| 19    | HISTO_Energy      | GLCM_Homogeneity  | GLRLM_RP          | HISTO_Entropy_log | GLCM_Energy       | GLRLM_SRE          |
| 20    | GLZLM_ZLNU        | GLRLM_RP          | HISTO_Energy      | GLCM_Homogeneity  | NGLDM_Coarsenes   | GLCM_Energy        |
| 21    | HISTO_Energy      | GLRLM_RP          | GLCM_Homogeneity  | GLCM_Energy       | GLRLM_SRE         | HISTO_Entropy_log  |
| 22    | GLRLM_RP          | GLCM_Homogeneity  | HISTO_Entropy_log | HISTO_Energy      | GLRLM_SRE         | GLZLM_ZLNU         |
| 23    | GLRLM_RP          | GLCM_Homogeneity  | GLRLM_SRE         | HISTO_Energy      | HISTO_Entropy_log | GLCM_Energy        |
| 24    | GLZLM_ZLNU        | SHAPE_Volume (ml) | GLCM_Homogeneity  | HISTO_Energy      | GLRLM_RP          | HISTO_Entropy_log  |
| 25    | HISTO_Energy      | GLZLM_ZLNU        | HISTO_Entropy_log | GLCM_Energy       | GLRLM_RP          | GLCM_Homogeneity   |
| 26    | GLZLM_ZLNU        | HISTO_Energy      | GLCM_Energy       | GLCM_Homogeneity  | GLRLM_RP          | HISTO_Entropy_log  |
| 27    | HISTO_Energy      | HISTO_Entropy_log | GLCM_Energy       | GLCM_Homogeneity  | GLRLM_RP          | GLZLM_ZLNU         |
| 28    | GLCM_Homogeneity  | HISTO_Energy      | GLRLM_RP          | HISTO_Entropy_log | GLRLM_SRE         | GLCM_Energy        |
| 29    | HISTO_Energy      | HISTO_Entropy_log | GLCM_Energy       | GLCM_Homogeneity  | GLRLM_RP          | GLZLM_ZLNU         |
| 30    | GLCM_Energy       | HISTO_Energy      | GLZLM_ZLNU        | GLCM_Homogeneity  | GLRLM_RP          | HISTO_Entropy_log  |
| 31    | HISTO_Energy      | HISTO_Entropy_log | GLCM_Energy       | GLCM_Homogeneity  | GLRLM_RP          | GLRLM_SRE          |
| 32    | HISTO_Energy      | GLCM_Homogeneity  | HISTO_Entropy_log | GLRLM_RP          | GLRLM_SRE         | GLCM_Energy        |
| 33    | GLRLM_RP          | GLCM_Homogeneity  | NGLDM_Busyness    | SHAPE_Volume (ml) | GLRLM_SRE         | HISTO_Energy       |
| 34    | HISTO_Energy      | SHAPE_Volume (ml) | GLZLM_ZLNU        | GLCM_Energy       | GLRLM_RP          | GLCM_Homogeneity   |
| 35    | GLCM_Homogeneity  | HISTO_Energy      | HISTO_Entropy_log | GLRLM_RP          | GLCM_Energy       | GLZLM_HGZE         |
| 36    | GLZLM_ZLNU        | GLCM_Energy       | NGLDM_Busyness    | HISTO_Energy      | GLRLM_RP          | minValue           |
| 37    | GLRLM_RP          | GLCM_Homogeneity  | GLRLM_SRE         | HISTO_Energy      | minValue          | HISTO_Entropy_log  |
| 38    | GLZLM_ZLNU        | HISTO_Energy      | GLCM_Energy       | GLRLM_RP          | NGLDM_Busyness    | GLCM_Homogeneity   |
| 39    | GLZLM_ZLNU        | minValue          | HISTO_Energy      | GLRLM_RP          | GLCM_Energy       | GLCM_Homogeneity   |
| 40    | GLZLM_ZLNU        | SHAPE_Volume (ml) | NGLDM_Busyness    | HISTO_Energy      | GLCM_Homogeneity  | GLRLM_RP           |
| 41    | GLRLM_RP          | GLCM_Homogeneity  | GLRLM_SRE         | HISTO_Energy      | GLCM_Energy       | HISTO_Entropy_log  |
| 42    | HISTO_Energy      | GLCM_Energy       | GLRLM_RP          | GLRLM_SRE         | HISTO_Entropy_log | GLCM_Homogeneity   |
| 43    | GLCM_Homogeneity  | GLRLM_RP          | GLZLM_ZLNU        | HISTO_Entropy_log | HISTO_Energy      | GLRLM_SRE          |
| 44    | GLCM_Homogeneity  | GLRLM_RP          | HISTO_Energy      | minValue          | GLCM_Energy       | HISTO_Entropy_log  |
| 45    | HISTO_Energy      | HISTO_Entropy_log | GLCM_Homogeneity  | GLCM_Energy       | GLRLM_RP          | GLZLM_ZLNU         |
| 46    | HISTO_Energy      | GLCM_Energy       | GLCM_Homogeneity  | GLRLM_RP          | HISTO_Entropy_log | GLRLM_SRE          |
| 47    | HISTO_Energy      | HISTO_Entropy_log | SHAPE_Volume (ml) | GLCM_Energy       | GLZLM_ZLNU        | GLCM_Homogeneity   |
| 48    | HISTO_Energy      | GLCM_Energy       | GLCM_Homogeneity  | HISTO_Entropy_log | minValue          | GLRLM_RP           |
| 49    | HISTO_Energy      | HISTO_Entropy_log | GLCM_Homogeneity  | GLRLM_RP          | GLCM_Energy       | GLRLM_SRE          |
| 50    | HISTO_Energy      | GLCM_Energy       | SHAPE_Volume (ml) | HISTO_Entropy_log | GLZLM_ZLNU        | GLCM_Homogeneity   |
| 51    | GLCM_Energy       | HISTO_Energy      | GLCM_Homogeneity  | GLRLM_RP          | HISTO_Entropy_log | SHAPE_Volume (ml)  |
| 52    | SHAPE_Volume (ml) | GLCM_Homogeneity  | HISTO_Energy      | GLRLM_RP          | GLZLM_ZLNU        | GLCM_Energy        |
| 53    | GLRLM_RP          | HISTO_Energy      | GLCM_Homogeneity  | GLCM_Energy       | GLRLM_SRE         | HISTO_Entropy_log  |
| 54    | HISTO_Energy      | GLCM_Homogeneity  | HISTO_Entropy_log | GLZLM_ZLNU        | GLCM_Energy       | GLRLM_RP           |
| 55    | HISTO_Energy      | GLRLM_RP          | GLCM_Homogeneity  | NGLDM_Busyness    | HISTO_Entropy_log | GLRLM_SRE          |
| 56    | HISTO_Energy      | GLCM_Homogeneity  | HISTO_Entropy_log | GLRLM_RP          | GLCM_Energy       | GLZLM_ZLNU         |
| 57    | HISTO_Energy      | HISTO_Entropy_log | GLCM_Homogeneity  | GLCM_Energy       | GLRLM_RP          | GLRLM_SRE          |
| 58    | HISTO_Energy      | HISTO_Entropy_log | GLCM_Homogeneity  | GLZLM_ZLNU        | GLRLM_RP          | NGLDM_Coarsenes    |
| 59    | GLZLM_ZLNU        | GLRLM_RP          | GLCM_Homogeneity  | HISTO_Energy      | SHAPE_Volume (ml) | NGLDM_Coarsenes    |
| 60    | GLZLM_ZLNU        | NGLDM_Coarsenes   | SHAPE_Volume (ml) | GLCM_Homogeneity  | HISTO_Energy      | GLRLM_RP           |
| 61    | GLZLM_ZLNU        | HISTO_Energy      | GLCM_Energy       | GLCM_Homogeneity  | HISTO_Entropy_log | SHAPE_Volume (ml)  |
| 62    | HISTO_Energy      | GLCM_Energy       | HISTO_Entropy_log | GLCM_Homogeneity  | GLRLM_RP          | GLZLM_ZLNU         |
| 63    | HISTO_Energy      | GLZLM_ZLNU        | HISTO_Entropy_log | minValue          | GLCM_Energy       | GLCM_Homogeneity   |
| 64    | HISTO_Energy      | GLCM_Homogeneity  | GLRLM_RP          | HISTO_Entropy_log | GLRLM_SRE         | GLCM_Energy        |
| 65    | HISTO_Energy      | HISTO_Entropy_log | GLCM_Homogeneity  | GLCM_Energy       | GLRLM_RP          | GLRLM_SRE          |
| 66    | HISTO_Energy      | GLCM_Energy       | GLZLM_ZLNU        | HISTO_Entropy_log | GLCM_Homogeneity  | GLRLM_RP           |
| 67    | HISTO_Energy      | GLZLM_ZLNU        | GLCM_Energy       | GLCM_Homogeneity  | HISTO_Entropy_log | GLRLM_RP           |
| 68    | HISTO_Energy      | GLCM_Energy       | HISTO_Entropy_log | GLCM_Homogeneity  | GLRLM_RP          | HISTO_Entropy_log1 |
| 69    | GLCM_Energy       | HISTO_Energy      | GLZLM_ZLNU        | GLRLM_RP          | GLCM_Homogeneity  | NGLDM_Coarsenes    |
| 70    | GLRLM_RP          | GLCM_Homogeneity  | HISTO_Energy      | GLRLM_SRE         | HISTO_Entropy_log | GLCM_Energy        |
| 71    | HISTO_Energy      | GLCM_Energy       | GLRLM_RP          | HISTO_Entropy_log | GLCM_Homogeneity  | GLRLM_SRE          |
| 72    | HISTO_Energy      | GLCM_Energy       | GLZLM_ZLNU        | HISTO_Entropy_log | SHAPE_Volume (ml) | GLCM_Homogeneity   |
| 73    | HISTO_Energy      | GLCM_Energy       | HISTO_Entropy_log | GLZLM_ZLNU        | GLZLM_SZE         | GLCM_Homogeneity   |
| 74    | GLZLM_ZLNU        | GLCM_Energy       | GLRLM_RP          | NGLDM_Busyness    | HISTO_Energy      | GLZLM_GLNU         |

|     |                   |                   |                   |                   |                   |                   |
|-----|-------------------|-------------------|-------------------|-------------------|-------------------|-------------------|
| 75  | GLCM_Homogeneity  | GLRLM_RP          | HISTO_Energy      | HISTO_Entropy_log | NGLDM_Coarseness  | GLRLM_SRE         |
| 76  | HISTO_Energy      | GLCM_Homogeneity  | HISTO_Entropy_log | GLRLM_SRHGE       | GLRLM_RP          | GLCM_Energy       |
| 77  | SHAPE_Volume (ml) | HISTO_Energy      | GLZLM_ZLNU        | NGLDM_Busyness    | GLCM_Energy       | GLRLM_SRHGE       |
| 78  | HISTO_Energy      | GLCM_Energy       | HISTO_Entropy_log | GLCM_Homogeneity  | GLRLM_RP          | GLZLM_ZLNU        |
| 79  | HISTO_Energy      | GLRLM_RP          | GLCM_Energy       | GLCM_Homogeneity  | GLRLM_SRE         | HISTO_Entropy_log |
| 80  | HISTO_Energy      | GLRLM_RP          | GLCM_Energy       | GLCM_Homogeneity  | GLRLM_SRE         | HISTO_Entropy_log |
| 81  | GLRLM_RP          | GLCM_Homogeneity  | HISTO_Energy      | HISTO_Entropy_log | GLRLM_SRE         | NGLDM_Coarseness  |
| 82  | GLCM_Homogeneity  | HISTO_Entropy_log | HISTO_Energy      | GLRLM_RP          | NGLDM_Coarseness  | GLRLM_SRHGE       |
| 83  | SHAPE_Volume (ml) | GLCM_Homogeneity  | GLRLM_RP          | GLZLM_ZLNU        | HISTO_Energy      | GLRLM_SRE         |
| 84  | HISTO_Energy      | GLCM_Homogeneity  | HISTO_Entropy_log | GLRLM_RP          | GLCM_Energy       | GLRLM_SRE         |
| 85  | HISTO_Energy      | GLZLM_ZLNU        | HISTO_Entropy_log | GLCM_Energy       | SHAPE_Volume (ml) | GLCM_Homogeneity  |
| 86  | GLCM_Energy       | HISTO_Energy      | GLZLM_ZLNU        | GLRLM_RP          | HISTO_Entropy_log | SHAPE_Volume (ml) |
| 87  | HISTO_Energy      | SHAPE_Volume (ml) | GLZLM_ZLNU        | NGLDM_Busyness    | GLCM_Homogeneity  | HISTO_Entropy_log |
| 88  | GLCM_Homogeneity  | GLRLM_RP          | NGLDM_Coarseness  | GLRLM_SRE         | GLZLM_ZLNU        | GLRLM_GLNU        |
| 89  | GLRLM_RP          | GLCM_Homogeneity  | HISTO_Energy      | GLRLM_SRE         | GLCM_Energy       | HISTO_Entropy_log |
| 90  | SHAPE_Volume (ml) | minValue          | GLZLM_ZLNU        | GLCM_Energy       | HISTO_Energy      | GLRLM_RP          |
| 91  | HISTO_Energy      | GLCM_Energy       | SHAPE_Volume (ml) | GLZLM_ZLNU        | GLCM_Homogeneity  | HISTO_Entropy_log |
| 92  | HISTO_Energy      | GLCM_Energy       | HISTO_Entropy_log | GLCM_Homogeneity  | GLRLM_RP          | GLZLM_ZLNU        |
| 93  | HISTO_Energy      | GLCM_Homogeneity  | HISTO_Entropy_log | GLCM_Energy       | GLRLM_RP          | GLRLM_SRHGE       |
| 94  | HISTO_Energy      | HISTO_Entropy_log | GLCM_Energy       | GLCM_Homogeneity  | GLRLM_RP          | GLZLM_ZLNU        |
| 95  | HISTO_Energy      | GLCM_Energy       | HISTO_Entropy_log | GLCM_Homogeneity  | GLRLM_RP          | SHAPE_Volume (ml) |
| 96  | HISTO_Energy      | GLCM_Homogeneity  | HISTO_Entropy_log | GLRLM_RP          | GLCM_Energy       | GLRLM_SRE         |
| 97  | GLCM_Homogeneity  | GLRLM_RP          | HISTO_Energy      | HISTO_Entropy_log | GLRLM_SRE         | GLCM_Energy       |
| 98  | GLCM_Homogeneity  | GLRLM_RP          | GLCM_Energy       | HISTO_Energy      | GLRLM_SRE         | HISTO_Entropy_log |
| 99  | GLZLM_ZLNU        | NGLDM_Coarseness  | HISTO_Energy      | GLRLM_RP          | SHAPE_Volume (ml) | GLCM_Homogeneity  |
| 100 | HISTO_Energy      | GLCM_Homogeneity  | HISTO_Entropy_log | GLRLM_RP          | GLZLM_ZLNU        | minValue          |

# **Contrast-enhanced T1WI. Feature selector: RFs**

| Cicle | Feature        |                |                   |                   |                   |                   |
|-------|----------------|----------------|-------------------|-------------------|-------------------|-------------------|
| 1     | minValue       | GLRLM_LRE      | HISTO_Energy      | GLZLM_SZE         | GLZLM_LZLGE       | GLZLM_LZE         |
| 2     | minValue       | GLZLM_LZE      | HISTO_Skewness    | HISTO_Energy      | SHAPE_Volume (mL) | GLZLM_LZLGE       |
| 3     | NGLDM_Busyness | GLZLM_SZE      | GLZLM_LZE         | minValue          | SHAPE_Volume (mL) | GLZLM_ZP          |
| 4     | minValue       | GLZLM_SZE      | NGLDM_Busyness    | GLZLM_LZE         | GLZLM_ZLNU        | GLZLM_HGZE        |
| 5     | NGLDM_Busyness | GLZLM_SZE      | GLZLM_LZE         | minValue          | GLZLM_ZLNU        | GLRLM_GLNU        |
| 6     | minValue       | GLZLM_SZE      | HISTO_Energy      | GLRLM_HGRE        | stdValue          | GLZLM_ZLNU        |
| 7     | minValue       | NGLDM_Busyness | GLZLM_SZE         | GLRLM_LRHGE       | GLZLM_ZLNU        | GLRLM_HGRE        |
| 8     | minValue       | GLZLM_SZE      | GLZLM_LZHGE       | GLZLM_LZE         | GLCM_Homogeneity  | HISTO_Energy      |
| 9     | minValue       | GLZLM_SZE      | GLZLM_LZE         | GLZLM_LZHGE       | HISTO_Energy      | GLCM_Homogeneity  |
| 10    | GLZLM_SZE      | minValue       | GLZLM_LZE         | GLRLM_HGRE        | stdValue          | GLRLM_LRHGE       |
| 11    | minValue       | GLZLM_LZE      | GLZLM_SZE         | GLZLM_LZLGE       | GLRLM_HGRE        | NGLDM_Coarseness  |
| 12    | minValue       | GLZLM_SZE      | GLZLM_LZE         | SHAPE_Volume (mL) | NGLDM_Busyness    | GLZLM_LZHGE       |
| 13    | GLZLM_SZE      | minValue       | GLZLM_ZLNU        | GLZLM_LZE         | GLZLM_LZLGE       | HISTO_Energy      |
| 14    | minValue       | GLZLM_LZE      | GLZLM_SZE         | GLZLM_ZLNU        | GLRLM_HGRE        | NGLDM_Coarseness  |
| 15    | GLZLM_SZE      | NGLDM_Busyness | minValue          | GLZLM_LZE         | GLZLM_HGZE        | GLZLM_SZLGE       |
| 16    | minValue       | GLZLM_SZE      | GLZLM_LZE         | GLZLM_HGZE        | GLZLM_LZLGE       | GLRLM_LRE         |
| 17    | minValue       | GLZLM_LZE      | GLZLM_SZE         | NGLDM_Busyness    | GLZLM_ZLNU        | HISTO_Energy      |
| 18    | GLZLM_SZE      | minValue       | GLRLM_HGRE        | GLZLM_LZE         | GLZLM_LZLGE       | GLRLM_LRHGE       |
| 19    | minValue       | HISTO_Energy   | GLZLM_SZE         | GLZLM_LZE         | GLRLM_GLNU        | GLZLM_LZHGE       |
| 20    | GLZLM_SZE      | minValue       | GLZLM_LZLGE       | GLZLM_LZE         | NGLDM_Busyness    | GLZLM_ZLNU        |
| 21    | minValue       | GLZLM_LZE      | GLZLM_LZHGE       | stdValue          | GLZLM_SZE         | HISTO_Energy      |
| 22    | GLZLM_LZE      | minValue       | GLZLM_SZE         | NGLDM_Busyness    | GLZLM_LZLGE       | GLZLM_LZHGE       |
| 23    | GLZLM_LZE      | GLZLM_LZLGE    | GLCM_Homogeneity  | minValue          | GLRLM_LRE         | GLRLM_HGRE        |
| 24    | GLZLM_SZE      | minValue       | NGLDM_Busyness    | GLZLM_LZLGE       | SHAPE_Volume (mL) | GLZLM_ZLNU        |
| 25    | minValue       | GLZLM_SZE      | GLZLM_ZLNU        | NGLDM_Busyness    | HISTO_Energy      | GLZLM_LZLGE       |
| 26    | minValue       | GLZLM_SZE      | GLCM_Homogeneity  | GLZLM_ZLNU        | GLZLM_LZE         | GLCM_Energy       |
| 27    | minValue       | HISTO_Energy   | GLZLM_LZLGE       | GLZLM_LZE         | GLZLM_ZP          | stdValue          |
| 28    | GLZLM_SZE      | NGLDM_Busyness | minValue          | GLZLM_LZE         | GLZLM_LZHGE       | GLZLM_LZLGE       |
| 29    | GLZLM_SZE      | GLRLM_HGRE     | HISTO_Energy      | minValue          | GLZLM_ZLNU        | NGLDM_Busyness    |
| 30    | GLZLM_SZE      | minValue       | GLZLM_LZE         | GLZLM_LZLGE       | GLZLM_SZLGE       | SHAPE_Volume (mL) |
| 31    | minValue       | GLZLM_SZE      | GLCM_Homogeneity  | GLZLM_LZE         | GLRLM_HGRE        | HISTO_Energy      |
| 32    | minValue       | GLZLM_SZE      | GLZLM_LZE         | NGLDM_Busyness    | SHAPE_Volume (mL) | NGLDM_Coarseness  |
| 33    | GLZLM_LZE      | NGLDM_Busyness | GLZLM_SZE         | minValue          | GLCM_Homogeneity  | GLZLM_LZLGE       |
| 34    | minValue       | GLZLM_SZE      | SHAPE_Volume (mL) | GLZLM_LZLGE       | GLZLM_LZE         | NGLDM_Busyness    |
| 35    | GLZLM_LZE      | minValue       | GLZLM_SZE         | GLCM_Homogeneity  | GLRLM_HGRE        | GLZLM_LZLGE       |
| 36    | minValue       | GLZLM_SZE      | NGLDM_Busyness    | GLZLM_LZE         | GLZLM_ZLNU        | GLZLM_LZLGE       |
| 37    | minValue       | GLZLM_SZE      | NGLDM_Busyness    | GLZLM_LZE         | GLZLM_LZLGE       | GLZLM_LZHGE       |
| 38    | GLZLM_SZE      | GLZLM_LZE      | minValue          | NGLDM_Busyness    | GLZLM_ZLNU        | GLZLM_LZLGE       |
| 39    | minValue       | GLZLM_SZE      | NGLDM_Busyness    | GLZLM_LZE         | GLZLM_LZLGE       | GLZLM_ZLNU        |
| 40    | minValue       | GLZLM_SZE      | GLZLM_LZE         | SHAPE_Volume (mL) | NGLDM_Busyness    | GLRLM_HGRE        |
| 41    | GLZLM_LZE      | minValue       | HISTO_Energy      | NGLDM_Busyness    | GLZLM_LZLGE       | GLRLM_HGRE        |
| 42    | GLZLM_SZE      | minValue       | GLZLM_LZE         | NGLDM_Busyness    | HISTO_Energy      | GLRLM_HGRE        |
| 43    | GLZLM_LZE      | minValue       | GLZLM_LZHGE       | HISTO_Energy      | GLRLM_HGRE        | NGLDM_Busyness    |
| 44    | minValue       | GLZLM_SZE      | GLZLM_LZE         | GLZLM_LZLGE       | GLZLM_LZHGE       | GLCM_Homogeneity  |
| 45    | GLRLM_HGRE     | GLZLM_SZE      | GLZLM_LZE         | minValue          | NGLDM_Busyness    | HISTO_Energy      |
| 46    | minValue       | GLZLM_SZE      | GLZLM_LZE         | NGLDM_Busyness    | HISTO_Energy      | GLZLM_LZLGE       |

|     |                  |                  |                   |                   |                   |                   |
|-----|------------------|------------------|-------------------|-------------------|-------------------|-------------------|
| 47  | minValue         | GLZLM_SZE        | NGLDM_Busyness    | GLRLM_HGRE        | GLRLM_LRHGE       | HISTO_Energy      |
| 48  | GLZLM_SZE        | minValue         | GLZLM_LZE         | GLZLM_LZLGE       | GLRLM_HGRE        | NGLDM_Busyness    |
| 49  | minValue         | GLZLM_SZE        | GLRLM_HGRE        | GLCM_Homogeneity  | GLZLM_LZLGE       | SHAPE_Volume (mL) |
| 50  | minValue         | GLZLM_SZE        | SHAPE_Volume (mL) | GLRLM_LRHGE       | GLZLM_LZE         | HISTO_Energy      |
| 51  | minValue         | GLZLM_SZE        | GLZLM_LZE         | SHAPE_Volume (mL) | GLZLM_LZLGE       | NGLDM_Busyness    |
| 52  | minValue         | GLZLM_LZE        | SHAPE_Volume (mL) | NGLDM_Busyness    | GLRLM_HGRE        | stdValue          |
| 53  | minValue         | GLZLM_LZLGE      | GLZLM_SZE         | GLRLM_LRE         | GLZLM_LZHGE       | GLZLM_LZE         |
| 54  | minValue         | GLZLM_SZE        | GLZLM_LZLGE       | GLZLM_LZE         | GLCM_Homogeneity  | stdValue          |
| 55  | minValue         | GLRLM_LRE        | GLCM_Homogeneity  | GLZLM_LZHGE       | stdValue          | GLZLM_SZE         |
| 56  | GLZLM_SZE        | minValue         | GLZLM_ZLNU        | GLCM_Homogeneity  | NGLDM_Busyness    | GLRLM_LRLGE       |
| 57  | minValue         | GLZLM_SZE        | GLZLM_LZE         | GLRLM_HGRE        | NGLDM_Busyness    | stdValue          |
| 58  | minValue         | GLZLM_SZE        | GLZLM_LZLGE       | GLZLM_LZE         | HISTO_Energy      | GLZLM_ZP          |
| 59  | minValue         | NGLDM_Busyness   | GLZLM_LZE         | GLZLM_SZE         | GLRLM_HGRE        | stdValue          |
| 60  | GLZLM_SZE        | GLZLM_LZE        | NGLDM_Busyness    | minValue          | GLZLM_ZLNU        | GLZLM_LZLGE       |
| 61  | GLZLM_SZE        | NGLDM_Busyness   | minValue          | GLCM_Homogeneity  | GLZLM_LZE         | GLZLM_SZLGE       |
| 62  | minValue         | GLZLM_SZE        | GLZLM_ZLNU        | GLZLM_LZLGE       | SHAPE_Volume (mL) | GLRLM_HGRE        |
| 63  | GLZLM_SZE        | minValue         | GLZLM_LZE         | GLZLM_LZLGE       | NGLDM_Busyness    | GLZLM_ZLNU        |
| 64  | minValue         | GLZLM_LZE        | NGLDM_Busyness    | GLZLM_SZE         | GLZLM_LZLGE       | NGLDM_Coarseness  |
| 65  | minValue         | GLZLM_LZLGE      | GLZLM_SZE         | HISTO_Energy      | GLZLM_LZE         | GLRLM_HGRE        |
| 66  | GLZLM_LZE        | minValue         | GLZLM_SZE         | NGLDM_Busyness    | GLZLM_LZLGE       | HISTO_Energy      |
| 67  | GLZLM_SZE        | minValue         | NGLDM_Busyness    | GLZLM_LZE         | GLZLM_ZLNU        | SHAPE_Volume (mL) |
| 68  | GLZLM_SZE        | minValue         | GLZLM_LZE         | HISTO_Energy      | stdValue          | GLRLM_HGRE        |
| 69  | GLZLM_SZE        | minValue         | GLZLM_LZE         | GLCM_Homogeneity  | GLZLM_LZLGE       | stdValue          |
| 70  | minValue         | GLZLM_SZE        | GLZLM_LZE         | NGLDM_Coarseness  | NGLDM_Busyness    | GLZLM_LZLGE       |
| 71  | minValue         | GLZLM_LZLGE      | GLRLM_HGRE        | NGLDM_Busyness    | GLCM_Homogeneity  | GLZLM_HGZE        |
| 72  | minValue         | GLZLM_SZE        | GLZLM_LZE         | stdValue          | GLZLM_GLNU        | maxValue          |
| 73  | GLZLM_SZE        | NGLDM_Busyness   | GLZLM_LZE         | GLRLM_LRHGE       | GLZLM_HGZE        | GLRLM_GLNU        |
| 74  | GLZLM_SZE        | minValue         | GLZLM_LZE         | SHAPE_Volume (mL) | NGLDM_Busyness    | GLRLM_LRHGE       |
| 75  | GLZLM_LZE        | NGLDM_Busyness   | minValue          | HISTO_Energy      | GLZLM_SZE         | GLRLM_LRE         |
| 76  | minValue         | GLZLM_LZLGE      | GLZLM_LZE         | GLRLM_HGRE        | GLCM_Homogeneity  | HISTO_Energy      |
| 77  | minValue         | GLZLM_SZE        | GLZLM_ZLNU        | NGLDM_Busyness    | SHAPE_Volume (mL) | maxValue          |
| 78  | GLZLM_LZLGE      | minValue         | NGLDM_Busyness    | GLZLM_SZE         | stdValue          | SHAPE_Volume (mL) |
| 79  | minValue         | GLZLM_SZE        | GLZLM_LZE         | GLZLM_LZHGE       | GLCM_Homogeneity  | stdValue          |
| 80  | minValue         | GLZLM_LZE        | GLRLM_HGRE        | SHAPE_Volume (mL) | GLZLM_SZE         | GLZLM_LZLGE       |
| 81  | minValue         | NGLDM_Busyness   | GLZLM_SZE         | GLCM_Homogeneity  | GLZLM_LZE         | NGLDM_Coarseness  |
| 82  | GLCM_Homogeneity | GLRLM_HGRE       | NGLDM_Busyness    | GLZLM_SZE         | minValue          | GLRLM_LRHGE       |
| 83  | minValue         | NGLDM_Busyness   | GLZLM_SZE         | GLZLM_LZE         | GLZLM_LZHGE       | stdValue          |
| 84  | minValue         | GLZLM_SZE        | GLZLM_LZE         | GLZLM_LZLGE       | HISTO_Energy      | GLRLM_HGRE        |
| 85  | GLZLM_LZE        | minValue         | GLRLM_HGRE        | GLZLM_LZHGE       | NGLDM_Busyness    | GLZLM_SZE         |
| 86  | minValue         | GLZLM_LZE        | GLZLM_SZE         | GLZLM_LZHGE       | HISTO_Energy      | GLZLM_LZLGE       |
| 87  | minValue         | GLZLM_SZE        | NGLDM_Busyness    | GLRLM_HGRE        | GLZLM_LZE         | GLZLM_LZLGE       |
| 88  | minValue         | GLZLM_LZE        | GLZLM_SZE         | NGLDM_Busyness    | GLRLM_LRHGE       | GLZLM_LZLGE       |
| 89  | minValue         | GLZLM_LZE        | GLZLM_LZLGE       | GLZLM_LZHGE       | GLCM_Homogeneity  | GLRLM_HGRE        |
| 90  | minValue         | GLZLM_SZE        | SHAPE_Volume (mL) | GLZLM_LZLGE       | GLZLM_LZE         | GLZLM_ZLNU        |
| 91  | minValue         | GLZLM_LZHGE      | GLZLM_LZE         | GLZLM_SZE         | GLRLM_LRHGE       | GLCM_Homogeneity  |
| 92  | GLZLM_SZE        | GLZLM_LZE        | NGLDM_Busyness    | minValue          | HISTO_Energy      | GLZLM_SZLGE       |
| 93  | minValue         | GLZLM_LZLGE      | NGLDM_Busyness    | GLZLM_SZE         | GLZLM_LZE         | NGLDM_Coarseness  |
| 94  | GLZLM_SZE        | minValue         | GLCM_Homogeneity  | GLRLM_HGRE        | GLZLM_LZE         | SHAPE_Volume (mL) |
| 95  | GLZLM_SZE        | minValue         | GLZLM_LZLGE       | stdValue          | HISTO_Energy      | GLZLM_LZE         |
| 96  | GLZLM_LZE        | GLZLM_LZLGE      | minValue          | HISTO_Energy      | GLZLM_SZE         | SHAPE_Volume (mL) |
| 97  | minValue         | GLCM_Homogeneity | GLZLM_LZLGE       | GLZLM_SZE         | GLZLM_LZE         | stdValue          |
| 98  | minValue         | NGLDM_Busyness   | GLZLM_LZLGE       | GLZLM_SZE         | GLZLM_LZE         | GLCM_Homogeneity  |
| 99  | minValue         | GLZLM_LZE        | GLZLM_SZE         | GLZLM_LZLGE       | NGLDM_Coarseness  | GLZLM_ZLNU        |
| 100 | GLZLM_SZE        | HISTO_Energy     | GLZLM_LZLGE       | GLZLM_LZE         | GLCM_Homogeneity  | minValue          |

#### Contrast-enhanced T1WI. Feature selector: LASSO

| Cicle | Feature           |                   |                  |                 |                 |                 |
|-------|-------------------|-------------------|------------------|-----------------|-----------------|-----------------|
| 1     | minValue          | HISTO_Entropy_log | HISTO_Energy     | NGLDM_Coarsenes | GLZLM_SZE       | GLZLM_HGZE      |
| 2     | stdValue          | HISTO_Entropy_log | HISTO_Energy     | GLRLM_RP        | NGLDM_Coarsenes | GLZLM_SZE       |
| 3     | minValue          | HISTO_Entropy_log | NGLDM_Coarsenes  | GLZLM_SZE       | GLZLM_ZLNU      |                 |
| 4     | minValue          | HISTO_Entropy_log | HISTO_Energy     | GLRLM_SRHGE     | GLRLM_RP        | GLZLM_SZE       |
| 5     | stdValue          | HISTO_Entropy_log | HISTO_Energy     | GLRLM_SRHGE     | GLRLM_RP        | NGLDM_Coarsenes |
| 6     | stdValue          | HISTO_Energy      | GLRLM_SRHGE      | NGLDM_Coarsenes | GLZLM_SZE       | GLZLM_ZLNU      |
| 7     | HISTO_Energy      | SHAPE_Volume (ml) | GLCM_Homogeneity | NGLDM_Coarsenes | GLZLM_SZE       | GLZLM_ZLNU      |
| 8     | HISTO_Entropy_log | GLCM_Homogeneity  | NGLDM_Coarsenes  | GLZLM_SZE       | GLZLM_ZLNU      |                 |
| 9     | minValue          | HISTO_Entropy_log | NGLDM_Coarsenes  | GLZLM_SZE       | GLZLM_ZLNU      |                 |
| 10    | minValue          | HISTO_Entropy_log | GLRLM_SRHGE      | NGLDM_Coarsenes | GLZLM_SZE       | GLZLM_ZLNU      |
| 11    | HISTO_Entropy_log | HISTO_Energy      | GLCM_Homogeneity | GLRLM_SRHGE     | GLZLM_SZE       | GLZLM_HGZE      |
| 12    | HISTO_Energy      | NGLDM_Coarsenes   | GLZLM_SZE        | GLZLM_ZLNU      |                 |                 |
| 13    | HISTO_Entropy_log | GLCM_Homogeneity  | NGLDM_Coarsenes  | GLZLM_SZE       | GLZLM_ZLNU      |                 |

|    |                   |                   |                   |                  |                 |                 |
|----|-------------------|-------------------|-------------------|------------------|-----------------|-----------------|
| 14 | HISTO_Entropy_log | NGLDM_Coarsenes   | GLZLM_SIZE        | GLZLM_ZLNU       |                 |                 |
| 15 | HISTO_Energy      | GLRLM_SRHGE       | GLRLM_RP          | NGLDM_Coarsenes  | GLZLM_SIZE      | GLZLM_HGZE      |
| 16 | minValue          | HISTO_Entropy_log | GLRLM_SRHGE       | GLZLM_SIZE       | GLZLM_HGZE      | GLZLM_ZLNU      |
| 17 | HISTO_Entropy_log | HISTO_Energy      | GLRLM_SRHGE       | GLZLM_SIZE       | GLZLM_ZLNU      |                 |
| 18 | stdValue          | HISTO_Entropy_log | HISTO_Energy      | GLRLM_SRHGE      | GLZLM_SIZE      | GLZLM_HGZE      |
| 19 | minValue          | HISTO_Entropy_log | HISTO_Energy      | GLCM_Homogeneity | NGLDM_Coarsenes | GLZLM_SIZE      |
| 20 | HISTO_Energy      | GLCM_Homogeneity  | GLRLM_SRHGE       | GLRLM_RP         | GLZLM_SIZE      | GLZLM_ZLNU      |
| 21 | HISTO_Energy      | GLRLM_RP          | NGLDM_Coarsenes   | GLZLM_SIZE       | GLZLM_ZLNU      |                 |
| 22 | HISTO_Entropy_log | GLRLM_RP          | NGLDM_Coarsenes   | GLZLM_ZLNU       |                 |                 |
| 23 | minValue          | stdValue          | HISTO_Entropy_log | GLRLM_SRHGE      | GLRLM_RP        | NGLDM_Coarsenes |
| 24 | HISTO_Entropy_log | NGLDM_Coarsenes   | GLZLM_SIZE        | GLZLM_HGZE       | GLZLM_ZLNU      |                 |
| 25 | stdValue          | HISTO_Entropy_log | HISTO_Energy      | GLRLM_SRHGE      | GLZLM_SIZE      | GLZLM_HGZE      |
| 26 | minValue          | HISTO_Energy      | GLZLM_SIZE        | GLZLM_ZLNU       |                 |                 |
| 27 | HISTO_Entropy_log | GLZLM_SIZE        | GLZLM_ZLNU        |                  |                 |                 |
| 28 | HISTO_Entropy_log | GLCM_Homogeneity  | GLZLM_SIZE        | GLZLM_ZLNU       |                 |                 |
| 29 | minValue          | stdValue          | HISTO_Entropy_log | GLZLM_SIZE       | GLZLM_ZLNU      |                 |
| 30 | stdValue          | HISTO_Energy      | GLRLM_RP          | GLZLM_SIZE       | GLZLM_ZLNU      |                 |
| 31 | minValue          | HISTO_Entropy_log | HISTO_Energy      | GLRLM_SRHGE      | NGLDM_Coarsenes | GLZLM_SIZE      |
| 32 | minValue          | HISTO_Entropy_log | HISTO_Energy      | NGLDM_Coarsenes  | GLZLM_ZLNU      |                 |
| 33 | stdValue          | HISTO_Entropy_log | HISTO_Energy      | GLCM_Homogeneity | GLRLM_RP        | NGLDM_Coarsenes |
| 34 | HISTO_Energy      | SHAPE_Volume (ml) | GLRLM_SRHGE       | GLRLM_RP         | NGLDM_Coarsenes | GLZLM_SIZE      |
| 35 | HISTO_Entropy_log | GLCM_Homogeneity  | GLZLM_SIZE        | GLZLM_HGZE       | GLZLM_ZLNU      |                 |
| 36 | minValue          | HISTO_Energy      | GLRLM_SRHGE       | GLRLM_RP         | NGLDM_Busyness  | GLZLM_SIZE      |
| 37 | minValue          | HISTO_Energy      | GLCM_Homogeneity  | NGLDM_Coarsenes  | GLZLM_SIZE      | GLZLM_ZLNU      |
| 38 | HISTO_Entropy_log | HISTO_Energy      | GLZLM_SIZE        | GLZLM_ZLNU       |                 |                 |
| 39 | minValue          | HISTO_Energy      | GLRLM_RP          | NGLDM_Coarsenes  | GLZLM_SIZE      | GLZLM_ZLNU      |
| 40 | minValue          | HISTO_Entropy_log | HISTO_Energy      | NGLDM_Coarsenes  | GLZLM_SIZE      | GLZLM_ZLNU      |
| 41 | HISTO_Energy      | GLCM_Homogeneity  | GLRLM_SRHGE       | GLRLM_RP         | NGLDM_Coarsenes | GLZLM_SIZE      |
| 42 | minValue          | stdValue          | HISTO_Entropy_log | HISTO_Energy     | GLRLM_RP        | GLZLM_ZLNU      |
| 43 | HISTO_Entropy_log | GLCM_Homogeneity  | GLZLM_SIZE        | GLZLM_ZLNU       |                 |                 |
| 44 | minValue          | HISTO_Energy      | GLCM_Homogeneity  | GLRLM_RP         | NGLDM_Coarsenes | GLZLM_SIZE      |
| 45 | minValue          | stdValue          | HISTO_Entropy_log | NGLDM_Coarsenes  | GLZLM_SIZE      | GLZLM_HGZE      |
| 46 | minValue          | HISTO_Entropy_log | HISTO_Energy      | GLRLM_SRHGE      | GLZLM_ZLNU      |                 |
| 47 | stdValue          | HISTO_Entropy_log | HISTO_Energy      | GLRLM_SRHGE      | NGLDM_Coarsenes | GLZLM_SIZE      |
| 48 | minValue          | HISTO_Energy      | GLZLM_SIZE        | GLZLM_HGZE       | GLZLM_ZLNU      |                 |
| 49 | minValue          | HISTO_Entropy_log | HISTO_Energy      | GLRLM_SRHGE      | NGLDM_Coarsenes | GLZLM_SIZE      |
| 50 | minValue          | HISTO_Entropy_log | HISTO_Energy      | GLCM_Homogeneity | NGLDM_Coarsenes | GLZLM_SIZE      |
| 51 | stdValue          | HISTO_Energy      | GLRLM_RP          | GLZLM_SIZE       | GLZLM_ZLNU      |                 |
| 52 | stdValue          | HISTO_Entropy_log | HISTO_Energy      | GLCM_Homogeneity | NGLDM_Coarsenes | GLZLM_SIZE      |
| 53 | minValue          | HISTO_Entropy_log | HISTO_Energy      | GLRLM_SRHGE      | GLRLM_RP        | GLZLM_SIZE      |
| 54 | minValue          | stdValue          | HISTO_Entropy_log | HISTO_Energy     | GLRLM_RP        | NGLDM_Coarsenes |
| 55 | stdValue          | HISTO_Entropy_log | GLRLM_RP          | NGLDM_Coarsenes  | GLZLM_ZLNU      |                 |
| 56 | minValue          | HISTO_Entropy_log | NGLDM_Coarsenes   | GLZLM_SIZE       | GLZLM_ZLNU      |                 |
| 57 | minValue          | HISTO_Entropy_log | NGLDM_Coarsenes   | GLZLM_SIZE       | GLZLM_ZLNU      |                 |
| 58 | minValue          | HISTO_Entropy_log | NGLDM_Coarsenes   | GLZLM_SIZE       | GLZLM_ZLNU      |                 |
| 59 | minValue          | HISTO_Entropy_log | GLRLM_SRHGE       | NGLDM_Coarsenes  | GLZLM_SIZE      | GLZLM_ZLNU      |
| 60 | stdValue          | HISTO_Energy      | GLCM_Homogeneity  | NGLDM_Coarsenes  | GLZLM_SIZE      | GLZLM_ZLNU      |
| 61 | minValue          | HISTO_Entropy_log | HISTO_Energy      | GLZLM_SIZE       | GLZLM_ZLNU      |                 |
| 62 | minValue          | HISTO_Energy      | NGLDM_Coarsenes   | GLZLM_SIZE       | GLZLM_ZLNU      |                 |
| 63 | minValue          | HISTO_Entropy_log | HISTO_Energy      | GLRLM_SRHGE      | NGLDM_Coarsenes | GLZLM_SIZE      |
| 64 | HISTO_Entropy_log | HISTO_Energy      | GLRLM_RP          | NGLDM_Coarsenes  | GLZLM_SIZE      | GLZLM_ZLNU      |
| 65 | minValue          | HISTO_Entropy_log | HISTO_Energy      | GLCM_Homogeneity | NGLDM_Coarsenes | GLZLM_SIZE      |
| 66 | minValue          | HISTO_Entropy_log | HISTO_Energy      | GLZLM_SIZE       | GLZLM_ZLNU      |                 |
| 67 | HISTO_Energy      | GLRLM_SRHGE       | GLZLM_SIZE        | GLZLM_HGZE       | GLZLM_ZLNU      |                 |
| 68 | HISTO_Entropy_log | GLZLM_SIZE        | GLZLM_ZLNU        |                  |                 |                 |
| 69 | HISTO_Energy      | GLRLM_RP          | GLZLM_SIZE        | GLZLM_ZLNU       |                 |                 |

|     |                        |                   |                   |                  |                 |                  |
|-----|------------------------|-------------------|-------------------|------------------|-----------------|------------------|
| 70  | stdValue<br>GLZLM_ZLNU | HISTO_Entropy_log | HISTO_Energy      | GLRLM_SRHGE      | GLRLM_RP        | NGLDM_Coarsenes: |
| 71  | minValue<br>GLZLM_ZLNU | stdValue          | HISTO_Entropy_log | HISTO_Energy     | GLRLM_SRHGE     | GLZLM_SZE        |
| 72  | stdValue               | HISTO_Energy      | NGLDM_Coarsenes:  | GLZLM_SZE        | GLZLM_ZLNU      |                  |
| 73  | minValue               | HISTO_Entropy_log | HISTO_Energy      | GLZLM_SZE        | GLZLM_ZLNU      |                  |
| 74  | minValue               | HISTO_Entropy_log | HISTO_Energy      | GLZLM_SZE        | GLZLM_ZLNU      |                  |
| 75  | minValue<br>GLZLM_ZLNU | HISTO_Entropy_log | HISTO_Energy      | GLCM_Homogeneity | NGLDM_Coarsenes | GLZLM_SZE        |
| 76  | minValue<br>GLZLM_ZLNU | HISTO_Entropy_log | HISTO_Energy      | GLRLM_SRHGE      | NGLDM_Coarsenes | GLZLM_SZE        |
| 77  | stdValue               | HISTO_Energy      | GLRLM_SRHGE       | GLZLM_SZE        | GLZLM_ZLNU      |                  |
| 78  | stdValue               | HISTO_Energy      | NGLDM_Coarsenes:  | GLZLM_SZE        | GLZLM_ZLNU      |                  |
| 79  | HISTO_Entropy_log      | HISTO_Energy      | GLRLM_SRHGE       | NGLDM_Coarsenes: | GLZLM_ZLNU      |                  |
| 80  | HISTO_Energy           | GLRLM_SRHGE       | GLRLM_RP          | GLZLM_SZE        | GLZLM_ZLNU      |                  |
| 81  | minValue               | HISTO_Entropy_log | GLZLM_ZLNU        |                  |                 |                  |
| 82  | minValue<br>GLZLM_ZLNU | HISTO_Entropy_log | HISTO_Energy      | GLRLM_SRHGE      | NGLDM_Coarsenes | GLZLM_SZE        |
| 83  | stdValue<br>GLZLM_HGZE | SHAPE_Volume (ml  | GLCM_Homogeneity  | GLRLM_SRHGE      | NGLDM_Coarsenes | GLZLM_SZE        |
| 84  | minValue<br>GLZLM_ZLNU | HISTO_Entropy_log | GLRLM_SRHGE       | GLRLM_RP         | NGLDM_Coarsenes | GLZLM_SZE        |
| 85  | minValue               | stdValue          | HISTO_Entropy_log | GLRLM_SRHGE      | GLZLM_SZE       | GLZLM_ZLNU       |
| 86  | stdValue               | HISTO_Entropy_log | HISTO_Energy      | GLZLM_SZE        | GLZLM_ZLNU      |                  |
| 87  | minValue<br>GLZLM_ZLNU | stdValue          | HISTO_Energy      | GLRLM_SRHGE      | NGLDM_Coarsenes | GLZLM_SZE        |
| 88  | minValue               | HISTO_Entropy_log | HISTO_Energy      | GLCM_Homogeneity | NGLDM_Coarsenes | GLZLM_ZLNU       |
| 89  | minValue<br>GLZLM_ZLNU | HISTO_Entropy_log | HISTO_Energy      | GLRLM_RP         | NGLDM_Coarsenes | GLZLM_HGZE       |
| 90  | minValue<br>GLZLM_ZLNU | HISTO_Entropy_log | HISTO_Energy      | GLRLM_SRHGE      | GLZLM_SZE       | GLZLM_HGZE       |
| 91  | HISTO_Entropy_log      | HISTO_Energy      | GLZLM_SZE         | GLZLM_ZLNU       |                 |                  |
| 92  | minValue<br>GLZLM_ZLNU | stdValue          | HISTO_Entropy_log | HISTO_Energy     | NGLDM_Coarsenes | GLZLM_SZE        |
| 93  | minValue               | HISTO_Entropy_log | GLRLM_SRHGE       | NGLDM_Coarsenes: | GLZLM_SZE       | GLZLM_ZLNU       |
| 94  | HISTO_Entropy_log      | HISTO_Energy      | NGLDM_Coarsenes:  | GLZLM_SZE        | GLZLM_ZLNU      |                  |
| 95  | minValue               | HISTO_Energy      | GLZLM_SZE         | GLZLM_ZLNU       |                 |                  |
| 96  | stdValue<br>GLZLM_ZLNU | HISTO_Entropy_log | HISTO_Energy      | GLCM_Homogeneity | NGLDM_Coarsenes | GLZLM_SZE        |
| 97  | stdValue               | HISTO_Energy      | GLCM_Homogeneity  | NGLDM_Coarsenes: | GLZLM_SZE       | GLZLM_ZLNU       |
| 98  | HISTO_Energy           | GLCM_Homogeneity  | GLRLM_RP          | GLZLM_SZE        | GLZLM_ZLNU      |                  |
| 99  | minValue               | HISTO_Energy      | NGLDM_Coarsenes:  | GLZLM_SZE        | GLZLM_ZLNU      |                  |
| 100 | minValue               | HISTO_Entropy_log | GLRLM_SRHGE       | GLZLM_SZE        | GLZLM_ZLNU      |                  |

## T2WI. Feature selector: DC

| Cicle | Feature          |                  |                  |                  |                    |                    |
|-------|------------------|------------------|------------------|------------------|--------------------|--------------------|
| 1     | GLCM_Homogeneity | GLRLM_SRE        | GLRLM_RP         | GLRLM_HGRE       | GLRLM_LRHGE        | GLRLM_SRLGE        |
| 2     | GLRLM_SRLGE      | GLRLM_LGRE       | GLZLM_LGZE       | GLCM_Homogeneity | GLRLM_LRLGE        | GLRLM_SRE          |
| 3     | NGLDM_Coarsenes  | GLRLM_HGRE       | GLRLM_LRHGE      | GLRLM_RP         | GLRLM_SRHGE        | GLRLM_SRE          |
| 4     | GLRLM_RP         | GLRLM_SRE        | GLCM_Homogeneity | NGLDM_Coarsenes: | GLRLM_GLNU         | GLRLM_SRLGE        |
| 5     | GLCM_Homogeneity | GLRLM_RP         | GLRLM_SRE        | NGLDM_Coarsenes: | GLRLM_SRLGE        | GLRLM_LRHGE        |
| 6     | GLRLM_RP         | GLRLM_SRE        | GLCM_Homogeneity | GLRLM_LRHGE      | GLRLM_SRLGE        | NGLDM_Coarsenes:   |
| 7     | GLZLM_LGZE       | GLRLM_HGRE       | GLRLM_SRLGE      | GLRLM_LGRE       | GLRLM_SRHGE        | GLZLM_SZHGE        |
| 8     | GLCM_Homogeneity | GLRLM_RP         | GLRLM_SRE        | NGLDM_Coarsenes: | GLCM_Dissimilarity | GLZLM_ZP           |
| 9     | GLRLM_RP         | GLRLM_SRE        | GLCM_Homogeneity | NGLDM_Coarsenes: | GLRLM_LRHGE        | GLZLM_ZP           |
| 10    | GLCM_Homogeneity | GLRLM_RP         | GLRLM_SRE        | GLRLM_SRLGE      | GLRLM_LRHGE        | GLZLM_LGZE         |
| 11    | GLRLM_RP         | GLRLM_SRE        | GLCM_Homogeneity | GLRLM_LRHGE      | GLRLM_HGRE         | NGLDM_Coarsenes:   |
| 12    | GLRLM_RP         | GLRLM_SRE        | GLCM_Homogeneity | GLRLM_LRHGE      | GLRLM_HGRE         | GLRLM_SRHGE        |
| 13    | GLCM_Homogeneity | GLRLM_SRE        | GLRLM_RP         | GLRLM_SRLGE      | GLRLM_LGRE         | GLCM_Dissimilarity |
| 14    | GLRLM_RP         | GLRLM_SRE        | GLCM_Homogeneity | GLRLM_LRHGE      | GLRLM_HGRE         | GLRLM_SRHGE        |
| 15    | GLRLM_SRE        | GLRLM_RP         | GLRLM_SRLGE      | GLRLM_LGRE       | GLCM_Homogeneity   | GLRLM_LRHGE        |
| 16    | GLRLM_HGRE       | GLRLM_SRE        | GLRLM_RP         | GLCM_Homogeneity | GLRLM_LRHGE        | GLRLM_SRHGE        |
| 17    | GLZLM_LGZE       | GLRLM_SRLGE      | GLRLM_LGRE       | GLZLM_SZLGE      | GLRLM_HGRE         | NGLDM_Coarsenes:   |
| 18    | GLRLM_LRHGE      | GLRLM_RP         | NGLDM_Coarsenes: | GLRLM_SRE        | GLRLM_HGRE         | GLRLM_SRLGE        |
| 19    | NGLDM_Coarsenes  | GLRLM_HGRE       | GLRLM_SRLGE      | GLZLM_LGZE       | GLRLM_SRE          | GLRLM_LRHGE        |
| 20    | GLRLM_RP         | GLRLM_SRE        | NGLDM_Coarsenes: | GLCM_Homogeneity | GLRLM_LRHGE        | GLRLM_HGRE         |
| 21    | GLCM_Homogeneity | GLRLM_RP         | GLRLM_SRE        | NGLDM_Coarsenes: | GLRLM_LRHGE        | GLRLM_SRLGE        |
| 22    | GLRLM_HGRE       | GLRLM_LRHGE      | GLRLM_SRHGE      | GLRLM_RP         | GLRLM_SRE          | GLRLM_SRLGE        |
| 23    | GLRLM_RP         | GLCM_Homogeneity | GLRLM_HGRE       | GLRLM_SRE        | GLRLM_LRHGE        | GLRLM_SRHGE        |
| 24    | GLRLM_RP         | GLRLM_SRE        | NGLDM_Coarsenes: | GLCM_Homogeneity | GLZLM_ZP           | GLRLM_SRLGE        |
| 25    | GLCM_Homogeneity | GLRLM_SRE        | GLRLM_RP         | NGLDM_Coarsenes: | GLRLM_SRLGE        | GLZLM_LGZE         |
| 26    | GLRLM_HGRE       | GLRLM_LRHGE      | GLRLM_SRHGE      | GLRLM_RP         | GLRLM_SRE          | GLZLM_SZHGE        |
| 27    | GLRLM_SRLGE      | GLRLM_LGRE       | GLZLM_LGZE       | GLRLM_LRLGE      | GLZLM_SZLGE        | GLCM_Homogeneity   |
| 28    | GLRLM_RP         | GLRLM_SRE        | GLCM_Homogeneity | GLRLM_SRLGE      | GLZLM_LGZE         | GLRLM_LGRE         |
| 29    | GLRLM_HGRE       | GLRLM_SRHGE      | GLZLM_SZHGE      | GLRLM_LRHGE      | GLZLM_HGZE         | HISTO_Skewness     |

|     |                  |                  |                  |                  |                  |                  |
|-----|------------------|------------------|------------------|------------------|------------------|------------------|
| 30  | GLRLM_SRLGE      | GLRLM_LGRE       | GLZLM_LGZE       | GLRLM_HGRE       | GLCM_Homogeneity | GLRLM_LP         |
| 31  | GLRLM_LP         | GLRLM_HGRE       | GLRLM_SRE        | NGLDM_Coarsenes  | GLRLM_LRHGE      | GLRLM_SRHGE      |
| 32  | GLRLM_SRLGE      | GLRLM_LGRE       | GLRLM_HGRE       | GLRLM_LRHGE      | GLRLM_SRHGE      | GLRLM_LP         |
| 33  | GLRLM_SRLGE      | GLRLM_LP         | GLRLM_SRE        | GLRLM_LGRE       | GLRLM_HGRE       | GLZLM_LGZE       |
| 34  | GLRLM_LP         | GLRLM_LRHGE      | GLRLM_SRE        | GLRLM_HGRE       | GLCM_Homogeneity | GLRLM_SRHGE      |
| 35  | GLRLM_LP         | GLRLM_SRLGE      | GLCM_Homogeneity | GLRLM_SRE        | GLRLM_LRHGE      | GLRLM_LGRE       |
| 36  | GLZLM_LGZE       | GLRLM_SRLGE      | GLCM_Homogeneity | GLRLM_LP         | GLRLM_LGRE       | GLRLM_SRE        |
| 37  | GLRLM_LP         | GLRLM_SRE        | NGLDM_Coarsenes  | GLRLM_SRLGE      | GLRLM_LRHGE      | GLRLM_LGRE       |
| 38  | GLRLM_SRE        | NGLDM_Coarsenes  | GLRLM_LP         | GLRLM_SRLGE      | GLRLM_LGRE       | GLZLM_LGZE       |
| 39  | GLRLM_LP         | GLRLM_SRE        | GLCM_Homogeneity | GLZLM_ZP         | GLRLM_LRHGE      | GLRLM_SRLGE      |
| 40  | GLRLM_HGRE       | GLRLM_SRHGE      | GLRLM_LRHGE      | GLZLM_HGZE       | GLZLM_SZHGE      | GLRLM_LP         |
| 41  | GLRLM_SRLGE      | GLRLM_LGRE       | GLRLM_LRLGE      | GLZLM_LGZE       | GLRLM_HGRE       | GLRLM_LRHGE      |
| 42  | GLRLM_SRLGE      | GLRLM_LGRE       | GLCM_Homogeneity | GLRLM_SRE        | GLRLM_LP         | GLZLM_LGZE       |
| 43  | GLRLM_HGRE       | GLRLM_LRHGE      | GLCM_Homogeneity | GLZLM_LGZE       | GLRLM_SRLGE      | GLRLM_SRHGE      |
| 44  | GLRLM_HGRE       | NGLDM_Coarsenes  | GLRLM_LP         | GLRLM_SRE        | GLCM_Homogeneity | GLRLM_SRHGE      |
| 45  | GLRLM_LP         | GLCM_Homogeneity | GLRLM_SRLGE      | GLRLM_SRE        | GLRLM_LGRE       | GLZLM_LGZE       |
| 46  | GLRLM_SRLGE      | GLZLM_LGZE       | GLRLM_LGRE       | GLCM_Homogeneity | GLZLM_SZHGE      | GLRLM_HGRE       |
| 47  | GLRLM_LRHGE      | GLRLM_HGRE       | GLRLM_SRHGE      | GLRLM_LP         | GLRLM_SRLGE      | GLRLM_SRE        |
| 48  | GLRLM_LP         | GLRLM_SRE        | GLCM_Homogeneity | GLRLM_LRHGE      | GLZLM_ZP         | GLRLM_LRE        |
| 49  | GLRLM_SRLGE      | GLRLM_LGRE       | GLZLM_LGZE       | GLRLM_LRLGE      | GLZLM_SZLGE      | GLRLM_HGRE       |
| 50  | GLRLM_HGRE       | GLRLM_LRHGE      | GLRLM_LP         | GLRLM_SRHGE      | GLRLM_SRE        | GLZLM_SZHGE      |
| 51  | GLRLM_LP         | GLRLM_SRE        | NGLDM_Coarsenes  | GLRLM_SRLGE      | GLCM_Homogeneity | GLRLM_LRHGE      |
| 52  | GLRLM_LP         | GLRLM_SRE        | GLCM_Homogeneity | NGLDM_Coarsenes  | GLZLM_LGZE       | GLRLM_SRLGE      |
| 53  | GLRLM_LP         | GLRLM_SRE        | GLRLM_SRLGE      | GLRLM_LGRE       | NGLDM_Coarsenes  | GLZLM_LGZE       |
| 54  | GLZLM_LGZE       | GLRLM_SRLGE      | GLRLM_LGRE       | GLRLM_LRHGE      | NGLDM_Coarsenes  | GLRLM_HGRE       |
| 55  | GLRLM_LRHGE      | GLRLM_HGRE       | GLRLM_SRLGE      | GLRLM_LGRE       | GLRLM_LP         | GLRLM_SRE        |
| 56  | GLRLM_LP         | GLRLM_SRLGE      | GLRLM_LGRE       | GLRLM_SRE        | GLZLM_LGZE       | GLRLM_LRHGE      |
| 57  | GLRLM_LP         | GLRLM_SRE        | GLRLM_SRLGE      | GLCM_Homogeneity | GLRLM_LGRE       | NGLDM_Coarsenes  |
| 58  | GLRLM_SRLGE      | GLRLM_LGRE       | GLZLM_LGZE       | GLRLM_LP         | GLRLM_SRE        | GLZLM_SZLGE      |
| 59  | GLRLM_HGRE       | GLRLM_LRHGE      | GLCM_Homogeneity | GLRLM_SRHGE      | GLRLM_LP         | GLRLM_SRE        |
| 60  | GLRLM_SRLGE      | GLRLM_LGRE       | GLZLM_LGZE       | GLCM_Homogeneity | NGLDM_Coarsenes  | GLRLM_SRE        |
| 61  | NGLDM_Coarsenes  | GLRLM_LRHGE      | GLZLM_ZLNU       | GLRLM_HGRE       | GLZLM_LGZE       | GLRLM_SRLGE      |
| 62  | GLRLM_LP         | GLRLM_SRE        | NGLDM_Coarsenes  | GLRLM_LRHGE      | GLCM_Homogeneity | GLRLM_HGRE       |
| 63  | GLRLM_LP         | GLRLM_SRE        | GLCM_Homogeneity | GLRLM_LRHGE      | GLRLM_HGRE       | GLRLM_SRLGE      |
| 64  | GLRLM_SRE        | GLCM_Homogeneity | GLRLM_LP         | GLRLM_SRLGE      | GLRLM_LGRE       | GLZLM_LGZE       |
| 65  | NGLDM_Coarsenes  | GLRLM_LP         | GLRLM_SRLGE      | GLZLM_LGZE       | GLRLM_SRE        | GLRLM_LGRE       |
| 66  | NGLDM_Coarsenes  | GLRLM_LP         | GLRLM_SRE        | GLRLM_LRHGE      | GLZLM_LGZE       | GLCM_Homogeneity |
| 67  | GLRLM_LP         | GLCM_Homogeneity | GLRLM_SRE        | GLRLM_LRHGE      | GLRLM_HGRE       | NGLDM_Coarsenes  |
| 68  | GLRLM_HGRE       | GLRLM_LP         | GLRLM_SRE        | GLRLM_LRHGE      | GLRLM_SRHGE      | GLCM_Homogeneity |
| 69  | GLRLM_LP         | GLRLM_SRE        | GLRLM_LRHGE      | GLCM_Homogeneity | NGLDM_Coarsenes  | GLRLM_HGRE       |
| 70  | GLRLM_LP         | GLRLM_SRE        | GLCM_Homogeneity | NGLDM_Coarsenes  | GLRLM_SRLGE      | GLZLM_LGZE       |
| 71  | GLCM_Homogeneity | GLRLM_SRE        | GLRLM_LP         | NGLDM_Coarsenes  | GLRLM_SRLGE      | GLRLM_LGRE       |
| 72  | GLZLM_LGZE       | GLRLM_SRLGE      | GLRLM_HGRE       | GLRLM_LGRE       | GLRLM_SRHGE      | GLZLM_HGZE       |
| 73  | GLRLM_HGRE       | GLRLM_LRHGE      | GLZLM_LGZE       | GLRLM_SRLGE      | GLRLM_LP         | GLZLM_SZHGE      |
| 74  | GLRLM_HGRE       | GLRLM_LRHGE      | GLRLM_SRLGE      | GLRLM_SRE        | GLRLM_LP         | GLCM_Homogeneity |
| 75  | GLCM_Homogeneity | GLRLM_LP         | GLRLM_SRE        | GLRLM_SRLGE      | GLRLM_LGRE       | GLZLM_ZP         |
| 76  | GLRLM_HGRE       | GLZLM_SZHGE      | GLRLM_SRLGE      | GLZLM_HGZE       | GLRLM_LGRE       | GLRLM_SRHGE      |
| 77  | GLRLM_HGRE       | GLRLM_LRHGE      | GLRLM_SRLGE      | GLRLM_LGRE       | GLRLM_SRHGE      | GLRLM_LP         |
| 78  | GLRLM_LP         | GLRLM_SRE        | GLCM_Homogeneity | GLRLM_HGRE       | GLRLM_LRHGE      | NGLDM_Coarsenes  |
| 79  | GLRLM_HGRE       | GLRLM_SRHGE      | GLZLM_SZHGE      | GLZLM_HGZE       | GLRLM_LRHGE      | GLRLM_SRLGE      |
| 80  | GLRLM_SRLGE      | GLRLM_LGRE       | GLRLM_HGRE       | GLZLM_LGZE       | GLRLM_LRHGE      | GLRLM_LP         |
| 81  | GLRLM_SRLGE      | GLRLM_LGRE       | GLZLM_LGZE       | GLRLM_LRLGE      | GLZLM_SZLGE      | NGLDM_Coarsenes  |
| 82  | GLCM_Homogeneity | GLRLM_LP         | GLRLM_SRE        | GLRLM_SRLGE      | GLZLM_LGZE       | GLRLM_LGRE       |
| 83  | GLCM_Homogeneity | GLRLM_LP         | GLRLM_SRLGE      | GLRLM_SRE        | GLRLM_LGRE       | GLRLM_LRHGE      |
| 84  | GLRLM_LP         | GLRLM_SRE        | NGLDM_Coarsenes  | GLCM_Homogeneity | GLRLM_LRHGE      | GLRLM_GLNU       |
| 85  | GLRLM_LP         | GLRLM_SRE        | GLCM_Homogeneity | NGLDM_Coarsenes  | GLRLM_SRLGE      | GLZLM_LGZE       |
| 86  | GLRLM_LP         | GLRLM_SRE        | GLCM_Homogeneity | GLRLM_LRHGE      | NGLDM_Coarsenes  | GLRLM_LRE        |
| 87  | GLRLM_HGRE       | GLRLM_LRHGE      | GLRLM_SRHGE      | GLRLM_SRE        | GLRLM_LP         | NGLDM_Coarsenes  |
| 88  | GLRLM_HGRE       | GLRLM_LRHGE      | GLRLM_SRHGE      | GLRLM_LP         | GLRLM_SRE        | GLCM_Homogeneity |
| 89  | GLRLM_LP         | GLRLM_SRE        | GLCM_Homogeneity | GLRLM_GLNU       | GLZLM_ZP         | GLRLM_LRHGE      |
| 90  | GLRLM_LP         | GLCM_Homogeneity | GLRLM_SRE        | GLRLM_SRLGE      | GLRLM_LGRE       | GLZLM_LGZE       |
| 91  | GLRLM_HGRE       | GLRLM_LRHGE      | GLRLM_SRHGE      | GLZLM_HGZE       | GLZLM_SZHGE      | GLRLM_SRLGE      |
| 92  | GLZLM_SZHGE      | GLRLM_HGRE       | GLRLM_SRLGE      | GLZLM_HGZE       | GLRLM_LGRE       | GLZLM_LGZE       |
| 93  | GLCM_Homogeneity | GLRLM_SRE        | GLRLM_LP         | NGLDM_Coarsenes  | GLRLM_SRLGE      | GLZLM_LGZE       |
| 94  | GLRLM_HGRE       | GLRLM_SRHGE      | GLZLM_SZHGE      | GLZLM_HGZE       | GLRLM_LRHGE      | GLRLM_LP         |
| 95  | GLZLM_LGZE       | GLRLM_SRLGE      | GLZLM_SZLGE      | GLRLM_LGRE       | NGLDM_Coarsenes  | GLCM_Homogeneity |
| 96  | GLRLM_HGRE       | GLRLM_SRHGE      | GLZLM_HGZE       | GLZLM_SZHGE      | GLRLM_LRHGE      | HISTO_Skewness   |
| 97  | GLRLM_LRHGE      | GLRLM_HGRE       | GLZLM_LGZE       | GLRLM_SRLGE      | GLRLM_LP         | GLRLM_LGRE       |
| 98  | GLRLM_LP         | GLRLM_SRE        | GLCM_Homogeneity | NGLDM_Coarsenes  | GLZLM_ZP         | GLRLM_GLNU       |
| 99  | GLRLM_SRLGE      | GLCM_Homogeneity | GLRLM_LRLGE      | GLRLM_HGRE       | GLRLM_LGRE       | GLRLM_LRHGE      |
| 100 | GLRLM_SRLGE      | GLRLM_LGRE       | GLRLM_HGRE       | GLRLM_LRHGE      | NGLDM_Coarsenes  | GLZLM_LGZE       |

## T2WI. Feature selector: RFs

| Cicle | Feature  |           |             |            |             |
|-------|----------|-----------|-------------|------------|-------------|
| 1     | minValue | GLZLM_LZE | GLZLM_LZHGE | GLRLM_GLNU | GLZLM_SZHGE |

|    |                  |                  |                  |                  |                  |                 |
|----|------------------|------------------|------------------|------------------|------------------|-----------------|
| 2  | GLZLM_LZE        | GLRLM_SRLGE      | GLRLM_LRLGE      | GLZLM_LZHGE      | GLZLM_SZE        | GLZLM_LGZE      |
| 3  | GLRLM_HGRE       | GLZLM_LZHGE      | GLZLM_HGZE       | GLZLM_SZHGE      | GLZLM_LZE        | minValue        |
| 4  | GLZLM_LZHGE      | GLRLM_SRLGE      | GLZLM_GLNU       | GLZLM_LZE        | GLRLM_GLNU       | GLRLM_RP        |
| 5  | GLZLM_LZE        | GLZLM_SZE        | minValue         | GLZLM_LZHGE      | GLRLM_LGRE       | GLZLM_ZP        |
| 6  | GLZLM_LZE        | GLZLM_LZHGE      | NGLDM_Coarsenes  | GLRLM_SRLGE      | GLZLM_SZE        | GLZLM_ZP        |
| 7  | GLZLM_LZHGE      | GLRLM_SRLGE      | GLZLM_SZE        | minValue         | GLZLM_SZHGE      | GLZLM_SZLGE     |
| 8  | GLZLM_LZE        | minValue         | GLZLM_LZHGE      | GLRLM_SRE        | GLCM_Homogeneity | NGLDM_Coarsenes |
| 9  | GLZLM_LZHGE      | GLZLM_LZE        | GLRLM_SRLGE      | GLRLM_LRE        | GLRLM_GLNU       | GLZLM_LZLGE     |
| 10 | GLZLM_LZE        | GLCM_Homogeneity | GLZLM_LZHGE      | GLZLM_SZE        | GLZLM_SZHGE      | GLZLM_HGZE      |
| 11 | GLZLM_LZHGE      | GLRLM_HGRE       | GLCM_Homogeneity | GLRLM_GLNU       | GLZLM_SZHGE      | GLRLM_LRLGE     |
| 12 | GLRLM_HGRE       | minValue         | GLZLM_LZHGE      | GLZLM_HGZE       | GLZLM_SZE        | GLZLM_LZLGE     |
| 13 | GLZLM_LZE        | GLZLM_LZHGE      | GLRLM_SRLGE      | minValue         | GLZLM_SZHGE      | GLZLM_SZE       |
| 14 | GLZLM_LZE        | GLZLM_LZHGE      | GLRLM_HGRE       | GLZLM_HGZE       | GLRLM_SRLGE      | GLZLM_SZE       |
| 15 | GLRLM_SRLGE      | GLRLM_HGRE       | GLZLM_LZHGE      | GLZLM_SZE        | GLZLM_LZE        | GLZLM_SZHGE     |
| 16 | GLRLM_HGRE       | GLZLM_LZHGE      | GLZLM_SZE        | GLZLM_HGZE       | GLZLM_SZHGE      | GLRLM_GLNU      |
| 17 | GLZLM_SZE        | GLRLM_LRLGE      | GLZLM_LZHGE      | minValue         | GLRLM_HGRE       | GLRLM_SRLGE     |
| 18 | GLZLM_LZHGE      | GLRLM_SRLGE      | GLRLM_HGRE       | NGLDM_Coarsenes  | GLZLM_SZHGE      | GLZLM_SZE       |
| 19 | GLRLM_SRLGE      | GLRLM_HGRE       | GLZLM_ZLNU       | GLZLM_LZE        | GLZLM_HGZE       | GLRLM_LRLGE     |
| 20 | GLZLM_LZE        | GLZLM_LZHGE      | GLRLM_HGRE       | minValue         | GLZLM_SZE        | GLRLM_RP        |
| 21 | GLZLM_LZE        | minValue         | GLZLM_HGZE       | GLCM_Homogeneity | GLZLM_SZHGE      | GLZLM_LZHGE     |
| 22 | GLRLM_HGRE       | GLZLM_LZHGE      | GLZLM_LZE        | GLZLM_SZE        | GLRLM_SRHGE      | GLRLM_SRE       |
| 23 | GLRLM_HGRE       | GLZLM_LZHGE      | GLZLM_LZE        | GLRLM_SRLGE      | GLZLM_HGZE       | GLZLM_SZHGE     |
| 24 | GLZLM_LZHGE      | NGLDM_Coarsenes  | GLZLM_LZE        | GLZLM_GLNU       | minValue         | GLRLM_LRE       |
| 25 | minValue         | GLZLM_SZE        | GLZLM_LZE        | GLCM_Homogeneity | GLRLM_GLNU       | GLZLM_LZHGE     |
| 26 | GLRLM_HGRE       | GLZLM_SZE        | GLZLM_LZHGE      | GLZLM_HGZE       | minValue         | GLRLM_GLNU      |
| 27 | GLRLM_SRLGE      | GLZLM_SZE        | GLZLM_LZHGE      | minValue         | GLZLM_SZLGE      | GLZLM_HGZE      |
| 28 | GLZLM_LZE        | GLZLM_SZE        | GLZLM_LGZE       | minValue         | GLZLM_SZHGE      | GLRLM_LRLGE     |
| 29 | GLRLM_HGRE       | GLZLM_SZE        | GLZLM_HGZE       | GLZLM_LZHGE      | HISTO_Skewness   | GLZLM_LZE       |
| 30 | GLRLM_SRLGE      | GLZLM_LZHGE      | GLRLM_LRLGE      | GLRLM_LGRE       | GLZLM_SZHGE      | GLZLM_LGZE      |
| 31 | GLZLM_LZHGE      | GLRLM_HGRE       | NGLDM_Coarsenes  | GLRLM_LRLGE      | GLRLM_RP         | minValue        |
| 32 | GLRLM_SRLGE      | GLZLM_LZHGE      | minValue         | GLRLM_LRHGE      | GLZLM_SZHGE      | GLRLM_HGRE      |
| 33 | GLRLM_SRLGE      | GLZLM_LZHGE      | minValue         | GLZLM_LGZE       | GLZLM_HGZE       | GLZLM_SZE       |
| 34 | GLZLM_LZHGE      | GLZLM_LZE        | GLRLM_HGRE       | GLRLM_LGRE       | minValue         | GLRLM_SRE       |
| 35 | GLZLM_LZHGE      | GLZLM_LZE        | GLZLM_HGZE       | minValue         | GLCM_Homogeneity | NGLDM_Coarsenes |
| 36 | GLRLM_SRLGE      | HISTO_Energy     | GLRLM_RP         | GLRLM_GLNU       | GLZLM_LGZE       | GLZLM_SZE       |
| 37 | GLZLM_LZHGE      | GLRLM_SRLGE      | GLRLM_HGRE       | GLZLM_LZE        | minValue         | GLZLM_ZP        |
| 38 | GLRLM_SRLGE      | minValue         | GLRLM_LRLGE      | GLZLM_LZE        | GLRLM_HGRE       | NGLDM_Coarsenes |
| 39 | GLZLM_LZHGE      | GLZLM_LZE        | GLRLM_SRLGE      | GLRLM_LRE        | minValue         | GLZLM_ZP        |
| 40 | GLRLM_HGRE       | GLZLM_LZHGE      | GLZLM_SZHGE      | GLZLM_LZE        | GLRLM_RP         | GLZLM_HGZE      |
| 41 | GLZLM_LZHGE      | GLRLM_HGRE       | GLRLM_LGRE       | GLZLM_SZE        | GLRLM_SRLGE      | minValue        |
| 42 | GLZLM_LZHGE      | GLZLM_HGZE       | GLRLM_HGRE       | GLRLM_LRE        | GLCM_Homogeneity | GLRLM_SRLGE     |
| 43 | GLRLM_SRLGE      | GLZLM_LZE        | GLRLM_LRLGE      | GLZLM_LZHGE      | GLRLM_HGRE       | GLZLM_GLNU      |
| 44 | GLZLM_LZHGE      | GLRLM_LRE        | GLZLM_HGZE       | GLRLM_RLNU       | GLZLM_SZHGE      | NGLDM_Coarsenes |
| 45 | GLZLM_LZE        | GLZLM_HGZE       | GLZLM_LZHGE      | GLRLM_LRLGE      | GLRLM_SRLGE      | GLZLM_SZHGE     |
| 46 | GLZLM_SZHGE      | GLZLM_SZE        | GLZLM_LGZE       | GLRLM_SRLGE      | GLRLM_LRLGE      | minValue        |
| 47 | GLRLM_HGRE       | GLZLM_LZHGE      | NGLDM_Coarsenes  | GLZLM_SZE        | GLZLM_HGZE       | NGLDM_Busyness  |
| 48 | GLZLM_LZE        | minValue         | GLRLM_SRLGE      | GLZLM_LZHGE      | GLCM_Homogeneity | GLRLM_GLNU      |
| 49 | GLRLM_SRLGE      | HISTO_Skewness   | GLZLM_HGZE       | GLRLM_LRLGE      | minValue         | GLZLM_LZHGE     |
| 50 | GLZLM_HGZE       | GLZLM_LZHGE      | GLRLM_HGRE       | GLCM_Correlation | GLRLM_GLNU       | minValue        |
| 51 | GLRLM_GLNU       | GLRLM_RLNU       | GLZLM_GLNU       | GLRLM_HGRE       | GLZLM_HGZE       | GLRLM_SRLGE     |
| 52 | GLRLM_GLNU       | NGLDM_Coarsenes  | GLRLM_SRLGE      | GLZLM_HGZE       | GLZLM_ZLNU       | GLZLM_LZE       |
| 53 | GLZLM_LZE        | GLZLM_LZHGE      | GLZLM_ZP         | GLZLM_SZE        | GLRLM_LRE        | GLRLM_RP        |
| 54 | GLRLM_HGRE       | GLRLM_SRLGE      | GLRLM_LRLGE      | GLZLM_HGZE       | GLRLM_RLNU       | GLZLM_LZE       |
| 55 | GLZLM_LZHGE      | GLRLM_HGRE       | GLZLM_HGZE       | GLZLM_SZE        | HISTO_Skewness   | GLRLM_LRLGE     |
| 56 | GLZLM_LZHGE      | GLRLM_HGRE       | GLZLM_LZE        | GLZLM_LGZE       | GLRLM_GLNU       | GLRLM_SRLGE     |
| 57 | GLRLM_GLNU       | minValue         | GLZLM_SZHGE      | GLZLM_ZP         | GLZLM_LZHGE      | GLZLM_LZE       |
| 58 | GLZLM_LZHGE      | GLZLM_LZE        | GLRLM_SRLGE      | minValue         | GLZLM_HGZE       | GLZLM_SZHGE     |
| 59 | GLZLM_HGZE       | GLRLM_GLNU       | GLRLM_SRLGE      | GLRLM_HGRE       | GLZLM_SZHGE      | GLZLM_GLNU      |
| 60 | GLRLM_SRLGE      | GLZLM_LZHGE      | GLZLM_LZE        | GLZLM_HGZE       | GLRLM_LRLGE      | GLRLM_GLNU      |
| 61 | GLRLM_GLNU       | GLRLM_HGRE       | GLZLM_LZE        | GLZLM_ZLNU       | GLRLM_LRHGE      | GLZLM_GLNU      |
| 62 | GLZLM_LZHGE      | GLZLM_SZE        | GLZLM_SZHGE      | GLZLM_LZE        | NGLDM_Coarsenes  | GLRLM_HGRE      |
| 63 | GLZLM_LZE        | GLZLM_LZHGE      | GLZLM_LZLGE      | GLRLM_HGRE       | minValue         | GLZLM_SZHGE     |
| 64 | GLZLM_LZHGE      | GLZLM_LZE        | GLRLM_SRLGE      | GLRLM_LRHGE      | GLCM_Homogeneity | GLRLM_HGRE      |
| 65 | GLZLM_LZHGE      | GLRLM_GLNU       | GLZLM_LZE        | GLRLM_SRLGE      | minValue         | GLRLM_LRLGE     |
| 66 | GLZLM_LZE        | GLRLM_GLNU       | GLZLM_LZHGE      | GLRLM_RLNU       | GLZLM_HGZE       | GLZLM_LGZE      |
| 67 | GLZLM_LZHGE      | GLRLM_HGRE       | GLCM_Homogeneity | minValue         | GLRLM_LRE        | GLZLM_LZE       |
| 68 | GLZLM_LZHGE      | GLRLM_HGRE       | GLZLM_HGZE       | GLZLM_SZHGE      | GLZLM_ZLNU       | GLZLM_SZE       |
| 69 | GLZLM_LZHGE      | minValue         | GLRLM_HGRE       | GLZLM_LZE        | GLZLM_LGZE       | GLRLM_SRE       |
| 70 | GLCM_Homogeneity | minValue         | GLZLM_LZE        | GLZLM_SZE        | GLRLM_SRLGE      | GLZLM_GLNU      |
| 71 | GLZLM_LZHGE      | GLZLM_ZLNU       | GLZLM_LZE        | GLRLM_LRLGE      | GLZLM_SZE        | GLZLM_LGZE      |
| 72 | GLRLM_SRLGE      | GLZLM_SZHGE      | GLRLM_GLNU       | GLRLM_LRLGE      | GLZLM_LZHGE      | GLZLM_HGZE      |
| 73 | GLRLM_HGRE       | GLZLM_SZE        | GLZLM_LZHGE      | minValue         | GLRLM_LRLGE      | GLZLM_LZE       |
| 74 | GLZLM_LZHGE      | GLRLM_HGRE       | GLZLM_HGZE       | GLZLM_SZE        | GLRLM_LGRE       | GLRLM_SRLGE     |
| 75 | GLZLM_LZE        | GLZLM_LZHGE      | GLCM_Homogeneity | GLZLM_SZHGE      | GLRLM_GLNU       | GLZLM_ZP        |
| 76 | GLRLM_HGRE       | GLRLM_SRLGE      | GLZLM_SZHGE      | GLZLM_HGZE       | GLZLM_LZHGE      | minValue        |
| 77 | GLRLM_LRLGE      | GLRLM_SRLGE      | GLZLM_LZHGE      | GLZLM_SZE        | GLRLM_HGRE       | GLZLM_ZLNU      |

|     |             |                |              |                  |                  |                  |
|-----|-------------|----------------|--------------|------------------|------------------|------------------|
| 78  | GLZLM_LZHGE | GLRLM_SRLGE    | GLRLM_GLNU   | GLRLM_HGRE       | minValue         | GLZLM_HGZE       |
| 79  | GLRLM_HGRE  | GLZLM_SZHGE    | GLZLM_HGZE   | GLZLM_LZHGE      | GLZLM_SZE        | GLRLM_LRHGE      |
| 80  | GLZLM_SZHGE | GLRLM_SRLGE    | GLRLM_HGRE   | GLZLM_LZHGE      | GLZLM_LZE        | GLZLM_SZE        |
| 81  | GLZLM_GLNU  | GLZLM_LZE      | GLZLM_LZHGE  | GLZLM_SZE        | GLCM_Homogeneity | GLRLM_RLNU       |
| 82  | minValue    | GLZLM_LZHGE    | GLZLM_SZHGE  | GLZLM_LZE        | GLRLM_SRLGE      | GLZLM_HGZE       |
| 83  | GLZLM_LZHGE | GLRLM_SRLGE    | GLRLM_LRLGE  | GLZLM_LZE        | GLCM_Homogeneity | GLRLM_LGRE       |
| 84  | GLZLM_LZHGE | GLZLM_LZE      | GLZLM_GLNU   | GLRLM_LRLGE      | GLRLM_SRLGE      | HISTO_Energy     |
| 85  | GLZLM_LZE   | GLRLM_SRLGE    | GLZLM_ZLNU   | NGLDM_Coarsenes  | GLZLM_SZE        | GLCM_Homogeneity |
| 86  | GLRLM_RLNU  | GLZLM_LZHGE    | minValue     | GLRLM_SRE        | GLRLM_GLNU       | GLRLM_HGRE       |
| 87  | GLZLM_LZHGE | GLRLM_HGRE     | GLZLM_HGZE   | HISTO_Skewness   | GLRLM_GLNU       | GLZLM_SZE        |
| 88  | GLZLM_LZHGE | GLZLM_HGZE     | GLRLM_HGRE   | GLZLM_SZE        | GLRLM_GLNU       | HISTO_Skewness   |
| 89  | GLZLM_LZE   | GLZLM_LZHGE    | HISTO_Energy | GLRLM_SRE        | GLZLM_ZP         | GLCM_Homogeneity |
| 90  | GLRLM_LRLGE | GLZLM_SZE      | GLZLM_LZHGE  | GLRLM_SRE        | GLZLM_LZE        | NGLDM_Coarsenes  |
| 91  | GLRLM_HGRE  | GLZLM_HGZE     | GLRLM_LRLGE  | GLZLM_LZHGE      | GLRLM_LRE        | minValue         |
| 92  | GLZLM_SZHGE | GLRLM_SRLGE    | GLZLM_LZHGE  | GLCM_Homogeneity | GLZLM_SZE        | GLRLM_LGRE       |
| 93  | GLRLM_SRLGE | GLZLM_SZE      | GLZLM_LZE    | NGLDM_Coarsenes  | GLZLM_LZHGE      | GLZLM_HGZE       |
| 94  | GLZLM_SZHGE | GLRLM_GLNU     | GLZLM_LZE    | GLZLM_LZHGE      | GLRLM_LRLGE      | GLZLM_SZE        |
| 95  | GLRLM_SRLGE | minValue       | GLZLM_ZP     | GLZLM_LZHGE      | GLZLM_SZLGE      | GLCM_Homogeneity |
| 96  | GLRLM_HGRE  | HISTO_Skewness | GLZLM_LZHGE  | GLZLM_SZHGE      | GLZLM_LZE        | GLCM_Homogeneity |
| 97  | GLZLM_LZE   | GLZLM_LZHGE    | GLRLM_HGRE   | GLZLM_ZLNU       | GLCM_Correlation | GLRLM_LGRE       |
| 98  | GLZLM_LZHGE | GLZLM_LZE      | GLZLM_ZLNU   | GLRLM_SRLGE      | GLCM_Homogeneity | GLZLM_ZP         |
| 99  | GLRLM_LRLGE | minValue       | GLRLM_SRLGE  | GLCM_Homogeneity | HISTO_Skewness   | GLRLM_LGRE       |
| 100 | GLRLM_SRLGE | GLZLM_LZHGE    | GLRLM_HGRE   | GLRLM_LRLGE      | GLZLM_SZHGE      | GLRLM_SRHGE      |

## T2WI. Feature selector: LASSO

| Cicle | Feature          |                    |                  |                 |                 |                 |
|-------|------------------|--------------------|------------------|-----------------|-----------------|-----------------|
| 1     | GLCM_Homogeneity | GLCM_Correlation   | GLRLM_HGRE       | GLRLM_SRLGE     | GLZLM_SZHGE     | GLZLM_ZLNU      |
| 2     | GLCM_Homogeneity | GLRLM_SRLGE        | NGLDM_Coarsenes  | GLZLM_LGZE      | GLZLM_SZHGE     | GLZLM_ZLNU      |
| 3     | GLCM_Correlation | GLRLM_HGRE         | GLRLM_RP         | GLZLM_SZHGE     | GLZLM_ZLNU      |                 |
| 4     | GLCM_Homogeneity | GLRLM_HGRE         | GLRLM_SRLGE      | NGLDM_Coarsenes | GLZLM_SZLGE     | GLZLM_ZLNU      |
| 5     | GLCM_Homogeneity | GLCM_Correlation   | GLRLM_HGRE       | GLRLM_SRLGE     | NGLDM_Coarsenes |                 |
| 6     | GLCM_Homogeneity | GLCM_Correlation   | GLRLM_HGRE       | GLRLM_SRLGE     | GLRLM_RP        | NGLDM_Coarsenes |
| 7     | GLCM_Homogeneity | GLCM_Correlation   | GLRLM_RP         | NGLDM_Coarsenes | GLZLM_LGZE      | GLZLM_SZHGE     |
| 8     | GLCM_Homogeneity | GLCM_Correlation   | GLRLM_HGRE       | GLRLM_SRLGE     | NGLDM_Coarsenes | GLZLM_ZLNU      |
| 9     | GLCM_Homogeneity | GLCM_Correlation   | GLRLM_SRE        | GLRLM_HGRE      | GLRLM_RP        | NGLDM_Coarsenes |
| 10    | GLCM_Homogeneity | GLRLM_SRLGE        | GLZLM_SZHGE      | GLZLM_ZLNU      |                 |                 |
| 11    | GLCM_Homogeneity | GLRLM_RP           | NGLDM_Coarsenes  | GLZLM_SZLGE     | GLZLM_SZHGE     | GLZLM_ZLNU      |
| 12    | GLCM_Homogeneity | GLCM_Correlation   | GLRLM_HGRE       | GLRLM_RP        |                 |                 |
| 13    | GLCM_Homogeneity | GLCM_Correlation   | GLRLM_SRLGE      | GLZLM_SZLGE     | GLZLM_SZHGE     | GLZLM_ZLNU      |
| 14    | GLCM_Homogeneity | GLRLM_HGRE         | GLRLM_SRLGE      | GLRLM_RP        | GLZLM_SZHGE     | GLZLM_ZLNU      |
| 15    | GLCM_Homogeneity | GLRLM_HGRE         | GLRLM_SRLGE      | GLRLM_RP        | NGLDM_Coarsenes | GLZLM_SZHGE     |
| 16    | GLCM_Homogeneity | GLCM_Correlation   | GLRLM_HGRE       | GLRLM_RP        | GLZLM_SZHGE     |                 |
| 17    | GLCM_Homogeneity | GLCM_Correlation   | GLRLM_SRLGE      | GLZLM_SZLGE     | GLZLM_SZHGE     | GLZLM_ZLNU      |
| 18    | GLRLM_HGRE       | GLRLM_SRLGE        | GLRLM_RP         | GLZLM_SZHGE     | GLZLM_ZLNU      |                 |
| 19    | GLCM_Homogeneity | GLRLM_SRE          | GLRLM_HGRE       | NGLDM_Coarsenes | GLZLM_SZLGE     | GLZLM_SZHGE     |
| 20    | GLCM_Homogeneity | GLCM_Correlation   | GLRLM_HGRE       | GLRLM_SRLGE     | GLRLM_RP        | NGLDM_Coarsenes |
| 21    | GLCM_Homogeneity | GLRLM_RP           | NGLDM_Coarsenes  | GLZLM_SZHGE     | GLZLM_ZLNU      |                 |
| 22    | GLRLM_SRE        | GLRLM_HGRE         | GLRLM_SRLGE      | GLRLM_RP        | NGLDM_Coarsenes | GLZLM_ZLNU      |
| 23    | GLCM_Homogeneity | GLCM_Correlation   | GLRLM_HGRE       | NGLDM_Coarsenes | GLZLM_ZLNU      |                 |
| 24    | GLCM_Homogeneity | GLCM_Correlation   | GLRLM_HGRE       | GLRLM_SRLGE     | GLRLM_RP        | NGLDM_Coarsenes |
| 25    | GLZLM_SZHGE      | GLZLM_ZLNU         |                  |                 |                 |                 |
| 26    | GLCM_Homogeneity | NGLDM_Coarsenes    | GLZLM_LGZE       | GLZLM_SZHGE     | GLZLM_ZLNU      |                 |
| 27    | GLCM_Correlation | GLRLM_SRE          | GLRLM_HGRE       | GLRLM_RP        | GLZLM_ZLNU      |                 |
| 28    | GLCM_Homogeneity | GLCM_Correlation   | GLRLM_HGRE       | GLRLM_SRLGE     | GLZLM_ZLNU      |                 |
| 29    | GLRLM_RP         | GLZLM_LGZE         | GLZLM_SZHGE      | GLZLM_ZLNU      |                 |                 |
| 30    | GLCM_Homogeneity | GLRLM_SRE          | GLZLM_SZE        | GLZLM_SZHGE     | GLZLM_ZLNU      |                 |
| 31    | GLCM_Homogeneity | GLCM_Correlation   | GLRLM_SRLGE      | NGLDM_Coarsenes | GLZLM_SZLGE     | GLZLM_SZHGE     |
| 32    | GLCM_Homogeneity | GLRLM_SRE          | GLRLM_HGRE       | NGLDM_Coarsenes | GLZLM_SZHGE     | GLZLM_ZLNU      |
| 33    | GLCM_Homogeneity | GLRLM_SRLGE        | GLRLM_RP         | NGLDM_Coarsenes | GLZLM_ZLNU      |                 |
| 34    | GLCM_Homogeneity | GLCM_Dissimilarity | GLRLM_HGRE       | GLRLM_SRLGE     | GLRLM_RP        | NGLDM_Coarsenes |
| 35    | GLCM_Homogeneity | GLCM_Correlation   | GLRLM_HGRE       | GLRLM_SRLGE     | GLZLM_SZLGE     |                 |
| 36    | GLCM_Homogeneity | GLZLM_LGZE         | GLZLM_SZLGE      | GLZLM_SZHGE     | GLZLM_ZLNU      |                 |
| 37    | GLRLM_HGRE       | GLRLM_SRLGE        | GLRLM_RP         | NGLDM_Coarsenes | GLZLM_ZLNU      |                 |
| 38    | GLCM_Homogeneity | GLRLM_SRE          | GLRLM_SRLGE      | NGLDM_Coarsenes | GLZLM_SZHGE     | GLZLM_ZLNU      |
| 39    | GLCM_Homogeneity | GLCM_Correlation   | GLRLM_HGRE       | GLRLM_SRLGE     | GLRLM_RP        |                 |
| 40    | GLCM_Homogeneity | GLCM_Correlation   | GLRLM_HGRE       | NGLDM_Coarsenes | GLZLM_SZHGE     |                 |
| 41    | GLCM_Homogeneity | GLCM_Correlation   | GLRLM_HGRE       | GLRLM_SRLGE     | GLZLM_ZLNU      |                 |
| 42    | minValue         | GLCM_Homogeneity   | GLCM_Correlation | GLRLM_HGRE      | GLRLM_RP        | GLZLM_LGZE      |
|       | GLZLM_SZHGE      |                    |                  |                 |                 |                 |



|     |                  |                    |                    |                 |                 |                  |
|-----|------------------|--------------------|--------------------|-----------------|-----------------|------------------|
| 43  | GLCM_Homogeneity | GLCM_Dissimilarity | GLRLM_HGRE         | NGLDM_Coarsenes | GLZLM_SZLGE     | GLZLM_ZLNU       |
| 44  | GLCM_Homogeneity | GLCM_Correlation   | GLRLM_HGRE         | GLRLM_RP        | NGLDM_Coarsenes | GLZLM_SZHGE      |
| 45  | GLCM_Homogeneity | GLCM_Correlation   | GLRLM_SRLGE        | NGLDM_Coarsenes | GLZLM_SZLGE     | GLZLM_SZHGE      |
| 46  | GLCM_Homogeneity | GLCM_Correlation   | NGLDM_Coarsenes    | GLZLM_SZE       | GLZLM_LGZE      | GLZLM_SZHGE      |
| 47  | GLRLM_HGRE       | GLRLM_SRLGE        | GLRLM_RP           | NGLDM_Coarsenes | GLZLM_ZLNU      |                  |
| 48  | GLCM_Homogeneity | GLCM_Correlation   | GLRLM_HGRE         | GLRLM_RP        | NGLDM_Coarsenes | GLZLM_LGZE       |
| 49  | GLCM_Homogeneity | GLCM_Dissimilarity | GLRLM_HGRE         | GLRLM_SRLGE     | NGLDM_Coarsenes | GLZLM_SZLGE      |
|     | GLZLM_SZHGE      | GLZLM_ZLNU         |                    |                 |                 |                  |
| 50  | GLCM_Homogeneity | GLCM_Correlation   | GLRLM_HGRE         | GLRLM_RP        | GLZLM_SZHGE     | GLZLM_ZLNU       |
| 51  | GLCM_Homogeneity | GLRLM_SRE          | GLRLM_HGRE         | GLRLM_SRLGE     | NGLDM_Coarsenes | GLZLM_SZLGE      |
|     | GLZLM_ZLNU       |                    |                    |                 |                 |                  |
| 52  | GLCM_Homogeneity | NGLDM_Coarsenes    | GLZLM_SZLGE        | GLZLM_SZHGE     | GLZLM_ZLNU      |                  |
| 53  | GLCM_Homogeneity | GLRLM_SRE          | NGLDM_Coarsenes    | GLZLM_SZLGE     | GLZLM_SZHGE     | GLZLM_ZLNU       |
| 54  | GLRLM_HGRE       | GLRLM_RP           | NGLDM_Coarsenes    | GLZLM_LGZE      | GLZLM_SZHGE     | GLZLM_ZLNU       |
| 55  | GLRLM_HGRE       | GLRLM_SRLGE        | GLRLM_RP           | NGLDM_Coarsenes | GLZLM_LGZE      |                  |
| 56  | GLRLM_HGRE       | GLRLM_RP           | GLZLM_SZLGE        |                 |                 |                  |
| 57  | GLCM_Homogeneity | GLRLM_RP           | GLZLM_SZLGE        | GLZLM_SZHGE     | GLZLM_ZLNU      |                  |
| 58  | GLCM_Correlation | GLRLM_HGRE         | GLRLM_SRLGE        | GLRLM_RP        | GLZLM_SZLGE     | GLZLM_SZHGE      |
|     | GLZLM_ZLNU       |                    |                    |                 |                 |                  |
| 59  | GLCM_Homogeneity | GLCM_Dissimilarity | GLRLM_HGRE         | NGLDM_Coarsenes | GLZLM_ZLNU      |                  |
| 60  | GLCM_Homogeneity | GLCM_Correlation   | GLRLM_HGRE         | GLRLM_SRLGE     | NGLDM_Coarsenes | GLZLM_HGZE       |
|     | GLZLM_ZLNU       |                    |                    |                 |                 |                  |
| 61  | minValue         | GLCM_Homogeneity   | GLCM_Correlation   | GLRLM_HGRE      | GLRLM_SRLGE     | NGLDM_Coarsenes: |
|     | GLZLM_ZLNU       |                    |                    |                 |                 |                  |
| 62  | GLCM_Homogeneity | GLRLM_HGRE         | GLRLM_SRLGE        | GLRLM_RP        | NGLDM_Coarsenes | GLZLM_SZHGE      |
|     | GLZLM_ZLNU       |                    |                    |                 |                 |                  |
| 63  | GLCM_Homogeneity | GLRLM_HGRE         | GLRLM_SRLGE        | GLRLM_RP        | GLZLM_SZHGE     | GLZLM_ZLNU       |
| 64  | GLCM_Homogeneity | GLRLM_HGRE         | GLRLM_SRLGE        | NGLDM_Coarsenes | GLZLM_ZLNU      |                  |
| 65  | GLCM_Correlation | GLRLM_HGRE         | GLRLM_RP           | NGLDM_Coarsenes | GLZLM_LGZE      | GLZLM_ZLNU       |
| 66  | GLCM_Homogeneity | GLRLM_RP           | NGLDM_Coarsenes    | GLZLM_SZHGE     | GLZLM_ZLNU      |                  |
| 67  | GLCM_Homogeneity | GLCM_Correlation   | GLRLM_HGRE         | NGLDM_Coarsenes | GLZLM_SZLGE     | GLZLM_ZLNU       |
| 68  | GLCM_Homogeneity | GLCM_Correlation   | GLRLM_HGRE         | GLRLM_RP        | NGLDM_Coarsenes | GLZLM_LGZE       |
|     | GLZLM_SZHGE      |                    |                    |                 |                 |                  |
| 69  | GLCM_Homogeneity | GLRLM_HGRE         | GLRLM_RP           | NGLDM_Coarsenes | GLZLM_SZE       | GLZLM_ZLNU       |
| 70  | GLCM_Homogeneity | GLCM_Correlation   | GLRLM_HGRE         | GLRLM_RP        | NGLDM_Coarsenes | GLZLM_ZLNU       |
| 71  | GLCM_Homogeneity | GLRLM_SRLGE        | NGLDM_Coarsenes    | GLZLM_SZHGE     | GLZLM_ZLNU      |                  |
| 72  | GLCM_Homogeneity | GLCM_Correlation   | GLRLM_SRLGE        | NGLDM_Coarsenes | GLZLM_SZLGE     | GLZLM_SZHGE      |
|     | GLZLM_ZLNU       |                    |                    |                 |                 |                  |
| 73  | GLCM_Correlation | GLRLM_RP           | GLZLM_SZHGE        | GLZLM_ZLNU      |                 |                  |
| 74  | GLCM_Homogeneity | GLRLM_SRLGE        | GLRLM_RP           | NGLDM_Coarsenes | GLZLM_SZHGE     | GLZLM_ZLNU       |
| 75  | GLCM_Homogeneity | GLCM_Correlation   | GLRLM_HGRE         | GLZLM_SZLGE     | GLZLM_SZHGE     |                  |
| 76  | GLCM_Homogeneity | GLCM_Correlation   | GLRLM_HGRE         | GLZLM_SZHGE     | GLZLM_ZLNU      |                  |
| 77  | GLCM_Homogeneity | GLRLM_HGRE         | GLRLM_SRLGE        | NGLDM_Coarsenes | GLZLM_LGZE      | GLZLM_SZHGE      |
| 78  | GLCM_Homogeneity | GLCM_Correlation   | GLRLM_HGRE         | GLRLM_SRLGE     | NGLDM_Coarsenes | GLZLM_SZHGE      |
|     | GLZLM_ZLNU       |                    |                    |                 |                 |                  |
| 79  | GLCM_Homogeneity | GLCM_Correlation   | GLRLM_RP           | NGLDM_Coarsenes | GLZLM_SZHGE     | GLZLM_ZLNU       |
| 80  | GLCM_Homogeneity | GLRLM_RP           | GLZLM_SZLGE        | GLZLM_SZHGE     |                 |                  |
| 81  | GLCM_Homogeneity | GLRLM_HGRE         | GLRLM_SRLGE        | GLRLM_RP        | NGLDM_Coarsenes | GLZLM_SZLGE      |
|     | GLZLM_ZLNU       |                    |                    |                 |                 |                  |
| 82  | GLCM_Homogeneity | GLCM_Correlation   | GLRLM_SRLGE        | GLZLM_SZHGE     |                 |                  |
| 83  | GLCM_Homogeneity | GLCM_Correlation   | GLCM_Dissimilarity | GLRLM_HGRE      | GLRLM_SRLGE     | GLRLM_RP         |
|     | GLZLM_SZLGE      | GLZLM_ZLNU         |                    |                 |                 |                  |
| 84  | GLCM_Homogeneity | GLRLM_HGRE         | GLRLM_RP           | NGLDM_Coarsenes | GLZLM_SZLGE     | GLZLM_SZHGE      |
|     | GLZLM_ZLNU       |                    |                    |                 |                 |                  |
| 85  | GLCM_Homogeneity | GLRLM_RP           | NGLDM_Coarsenes    | GLZLM_SZHGE     | GLZLM_ZLNU      |                  |
| 86  | GLCM_Homogeneity | GLRLM_HGRE         | GLRLM_SRLGE        | GLRLM_RP        | GLZLM_ZLNU      |                  |
| 87  | GLCM_Homogeneity | GLCM_Correlation   | GLRLM_SRE          | GLRLM_HGRE      | NGLDM_Coarsenes | GLZLM_ZLNU       |
| 88  | GLCM_Correlation | GLRLM_HGRE         | GLRLM_RP           | NGLDM_Coarsenes | GLZLM_SZLGE     | GLZLM_SZHGE      |
| 89  | GLCM_Homogeneity | GLRLM_RP           | NGLDM_Coarsenes    | GLZLM_SZHGE     | GLZLM_ZLNU      |                  |
| 90  | GLCM_Homogeneity | GLRLM_HGRE         | GLZLM_SZLGE        | GLZLM_SZHGE     | GLZLM_ZLNU      |                  |
| 91  | GLCM_Homogeneity | GLCM_Correlation   | GLRLM_HGRE         | NGLDM_Coarsenes | GLZLM_SZLGE     | GLZLM_ZLNU       |
| 92  | GLCM_Homogeneity | GLCM_Correlation   | GLRLM_SRLGE        | GLZLM_SZHGE     |                 |                  |
| 93  | GLCM_Homogeneity | NGLDM_Coarsenes    | GLZLM_SZLGE        | GLZLM_SZHGE     | GLZLM_ZLNU      |                  |
| 94  | GLCM_Homogeneity | GLRLM_HGRE         | NGLDM_Coarsenes    | GLZLM_SZLGE     | GLZLM_SZHGE     | GLZLM_ZLNU       |
| 95  | GLCM_Homogeneity | GLCM_Correlation   | GLRLM_SRLGE        | NGLDM_Coarsenes | GLZLM_SZLGE     | GLZLM_SZHGE      |
|     | GLZLM_ZLNU       |                    |                    |                 |                 |                  |
| 96  | GLCM_Homogeneity | GLCM_Correlation   | GLRLM_HGRE         | NGLDM_Coarsenes | GLZLM_SZHGE     | GLZLM_ZLNU       |
| 97  | GLCM_Correlation | GLRLM_HGRE         | GLRLM_RP           | GLZLM_LGZE      | GLZLM_SZLGE     | GLZLM_ZLNU       |
| 98  | GLRLM_HGRE       | GLRLM_SRLGE        | GLRLM_RP           | NGLDM_Coarsenes | GLZLM_ZLNU      |                  |
| 99  | GLCM_Homogeneity | GLCM_Correlation   | GLRLM_HGRE         | GLRLM_SRLGE     | GLZLM_SZHGE     | GLZLM_ZLNU       |
| 100 | GLCM_Homogeneity | GLRLM_SRE          | GLRLM_HGRE         | GLRLM_SRLGE     | GLRLM_RP        | NGLDM_Coarsenes: |
|     | GLZLM_ZLNU       |                    |                    |                 |                 |                  |
