# Supplementary material for: Differentiation between Germinoma and Craniopharyngioma Using Radiomics-Based Machine Learning
Source: MDPI journal article supplement (doi:10.3390/jpm12010045), 2022-01-04
Supplement: s1 [file s1]

| Contrast-enhanced T1WI<br>Classifier: LDA | Distance Correlation | Random Forest | Lasso |
|-------------------------------------------|----------------------|---------------|-------|
| Sensitivity_train                         | 0.767857143          | 0.845201238   | 0.843 |
| Specificity_train                         | 0.901746725          | 0.861480076   | 0.92  |
| Sensitivity_test                          | 0.757894737          | 0.813333333   | 0.796 |
| Specificity_test                          | 0.824                | 0.772413793   | 0.843 |
| AUC_train                                 | 0.909013613          | 0.927478054   | 0.966 |
| AUC_test                                  | 0.888541339          | 0.858394547   | 0.914 |
| accuracy_train                            | 0.84                 | 0.855294118   | 0.887 |
| accuracy_test                             | 0.795454545          | 0.786363636   | 0.823 |

| Contrast-enhanced T1WI<br>Classifier: SVM | Distance Correlation | Random Forest | Lasso |
|-------------------------------------------|----------------------|---------------|-------|
| Sensitivity_train                         | 0.579545455          | 1             | 0.693 |
| Specificity_train                         | 0.875776398          | 1             | 0.767 |
| Sensitivity_test                          | 0.587412587          | error         | 0.654 |
| Specificity_test                          | 0.87012987           | 0.572727273   | 0.705 |
| AUC_train                                 | 0.82887189           | 1             | 0.801 |
| AUC_test                                  | 0.820774604          | 0.5           | 0.751 |
| accuracy_train                            | 0.691764706          | 1             | 0.739 |
| accuracy_test                             | 0.686363636          | 0.572727273   | 0.686 |

| Contrast-enhanced T1WI<br>Classifier: RF | Distance Correlation | Random Forest | Lasso |
|------------------------------------------|----------------------|---------------|-------|
| Sensitivity_train                        | 0.763157895          | 0.869918699   | 0.856 |
| Specificity_train                        | 0.832677165          | 0.948024948   | 0.864 |
| Sensitivity_test                         | 0.717647059          | 0.813186813   | 0.747 |
| Specificity_test                         | 0.755555556          | 0.84496124    | 0.738 |
| AUC_train                                | 0.89096405           | 0.971741597   | 0.949 |
| AUC_test                                 | 0.785677236          | 0.910807917   | 0.832 |
| accuracy_train                           | 0.804705882          | 0.914117647   | 0.861 |
| accuracy_test                            | 0.740909091          | 0.831818182   | 0.741 |
