# Supplementary material for: Differentiation between Germinoma and Craniopharyngioma Using Radiomics-Based Machine Learning
Source: MDPI journal article supplement (doi:10.3390/jpm12010045), 2022-01-04
Supplement: s1 [file s1]

| T2WI<br>Classifier: LDA | Distance Correlation | Random Forest | Lasso |
|-------------------------|----------------------|---------------|-------|
| Sensitivity_train       | 0.739263804          | 0.706051873   | 0.753 |
| Specificity_train       | 0.837004405          | 0.838337182   | 0.897 |
| Sensitivity_test        | 0.75                 | 0.75          | 0.71  |
| Specificity_test        | 0.810344828          | 0.851851852   | 0.822 |
| AUC_train               | 0.884940576          | 0.852653033   | 0.92  |
| AUC_test                | 0.880166764          | 0.850786783   | 0.875 |
| accuracy_train          | 0.796153846          | 0.779487179   | 0.831 |
| accuracy_test           | 0.785                | 0.805         | 0.77  |

| T2WI<br>Classifier: SVM | Distance Correlation | Random Forest | Lasso       |
|-------------------------|----------------------|---------------|-------------|
| Sensitivity_train       | 0.603305785          | 1             | 0.592668024 |
| Specificity_train       | 0.922297297          | 1             | 0.916955017 |
| Sensitivity_test        | 0.62601626           | error         | 0.636363636 |
| Specificity_test        | 0.896103896          | 0.575         | 0.898734177 |
| AUC_train               | 0.868855237          | 1             | 0.8572263   |
| AUC_test                | 0.873151168          | 0.5           | 0.862297897 |
| accuracy_train          | 0.724358974          | 1             | 0.712820513 |
| accuracy_test           | 0.73                 | 0.575         | 0.74        |

| T2WI<br>Classifier: RF | Distance Correlation | Random Forest | Lasso |
|------------------------|----------------------|---------------|-------|
| Sensitivity_train      | 0.798657718          | 0.829508197   | 0.846 |
| Specificity_train      | 0.840248963          | 0.869473684   | 0.882 |
| Sensitivity_test       | 0.69047619           | 0.674698795   | 0.682 |
| Specificity_test       | 0.767241379          | 0.752136752   | 0.765 |
| AUC_train              | 0.915251592          | 0.94806841    | 0.945 |
| AUC_test               | 0.844366779          | 0.783381778   | 0.832 |
| accuracy_train         | 0.824358974          | 0.853846154   | 0.868 |
| accuracy_test          | 0.735                | 0.72          | 0.73  |
